# Supplementary material for: Microbial community profiling shows dysbiosis in the lesional skin of Vitiligo subjects
Source: PubMed Central journal article supplement (PMC4725359; doi:10.1038/srep18761), 2016-01-13
Supplement: srep18761-s1.pdf [file srep18761-s1.pdf]

# Microbial community profiling shows dysbiosis in the lesional skin of Vitiligo subjects

Parul Ganju<sup>1,2#</sup>, Sunil Nagpal<sup>3#</sup>, Mohammed MH<sup>3</sup>, Nishal Kumar P<sup>3</sup>, Rajesh Pandey<sup>4</sup>, Vivek T Natarajan<sup>1</sup>,  
Sharmila S. Mande<sup>3\*</sup> and Rajesh S. Gokhale<sup>1, 2, 5\*</sup>

---

## Supplementary information content

### Supplementary methods and references

**Supplementary Figure S1:** Alpha rarefaction plot for the samples used in the study

**Supplementary Figure S2:** Core skin microbiome of lesional and non-lesional samples

**Supplementary Figure S3:** Principal component analysis (PCoA) of lesional and non-lesional bacterial communities

**Supplementary Figure S4:** Intra-community network analysis: a) Non-lesional skin, b) Lesional Skin

**Supplementary Figure S5:** Sampling locations from Vitiligo subjects used in this study

**Supplementary Figure S6:** Schematic description of the algorithm used for taxonomic assignment of individual OTU clusters

**Supplementary Figure S7:** Community composition of lesional and non-lesional skin of Vitiligo subjects. Samples were obtained from anatomically similar sites.

**Supplementary Figure S8:**  $\alpha$ -diversity trends in lesional (Vitiligo) and non-lesional (Normal) skin samples taken from anatomically similar sites

**Supplementary Figure S9:** Core microbiota comparison between lesional and non-lesional skin of vitiligo subjects. The samples were taken from anatomically similar sites.

**Supplementary Figure S10:** Ordination Analysis of cutaneous microbiome of lesional and non-lesional skin. The samples were taken from anatomically similar sites

**Supplementary Figure S11:** Differentiating taxa of lesional and non-lesional skin. The samples were taken from anatomically similar sites.

# Microbial community profiling shows dysbiosis in the lesional skin of Vitiligo subjects

Parul Ganju<sup>1,2#</sup>, Sunil Nagpal<sup>3#</sup>, Mohammed MH<sup>3</sup>, Nishal Kumar P<sup>3</sup>, Rajesh Pandey<sup>4</sup>, Vivek T Natarajan<sup>1</sup>,  
Sharmila S. Mande<sup>3\*</sup> and Rajesh S. Gokhale<sup>1, 2, 5\*</sup>

---

## Supplementary information content (*cont.*)

**Supplementary Figure S12:** Comparison between a) non-lesional and (b) lesional bacterial composition using Intra-community network analysis. The samples were taken from anatomically similar sites.

**Supplementary Figure S13:** Intra-community network analysis of cutaneous microbiota. The samples were taken from anatomically similar sites.

**Supplementary Table S1:** Good's coverage estimate for sampling completeness for all samples

**Supplementary Table S2:** Summary of 'number of taxa' at various ranges of relative contribution

**Supplementary Table S3:** Comparison of properties of lesional and non-lesional microbial community networks

**Supplementary Table S4:** Comparison of various Phylogenetic and Phenotypic properties of top degree nodes of the microbial community interaction network for a) Non-lesional and (b) Lesional datasets of present study.

**Supplementary Table S5:** Subject information

**Supplementary Table S6:** MID sequences used for primer designing

**Supplementary Table S7:** Sample Ids, sampling sites and primers used for each sample in this study

**Supplementary Table S8:** A list of differentially abundant taxa (RDP classification) between lesional and non-lesional skin obtained using the Wilcoxon test coupled to a bootstrapping approach. Samples were obtained from anatomically similar sites.

**Supplementary Table S9:** A list of differentially abundant OTUs between lesional (Vitiligo) and non-lesional (Normal) skin obtained using the Wilcoxon test coupled to a bootstrapping approach. Samples were obtained from anatomically similar sites.

## Supplementary methods

### *Sample Collection*

Samples were collected from non-overlapping sites, with no prior cleaning of skin surface by swabbing<sup>1</sup>. Swabs were obtained from 5 cm<sup>2</sup> areas using sterile cotton tipped applicators (HiMedia) soaked in enzymatic lysis buffer (sterile 0.15 M NaCl with 0.1% Tween 20). Negative controls of mock swabs were collected and analyzed for each sampling. Paired samples were collected from lesional (depigmented) and non-lesional (uninvolved pigmented) skin sites from each subject. Samples of the uninvolved skin were taken close to the lesional skin (about 10 cm distance).

### *Sequencing coverage, Rarefaction analysis and Diversity indices*

Sequencing coverage was estimated using Good's index<sup>2</sup>. Rarefaction analysis was also performed on the raw-OTU cluster abundance data using PAST 3.0<sup>3</sup>. The R package phyloseq<sup>4</sup> was employed on (1) genus level abundance data obtained using RDP classifier, and (2) OTU level abundance data for calculating various microbial diversity indices.

## References

1. Grice, E.A. et al. Topographical and temporal diversity of the human skin microbiome. *Science* 324, 1190-2 (2009).
2. Good, I.J. The population frequencies of species and the estimation of population parameters. *Biometrika* 40, 237–264 (1953).
3. Hammer, O., Harper, D.A.T., Ryan, P.D. PAST: Paleontological statistics software package for education and data analysis. *Palaeontologia Electronica* 4, 9pp (2001).
4. McMurdie, P.J. & Holmes, S. phyloseq: an R package for reproducible interactive analysis and graphics of microbiome census data. *PLoS One* 8, e61217 (2013).

# Alpha rarefaction plot for the samples used in the study

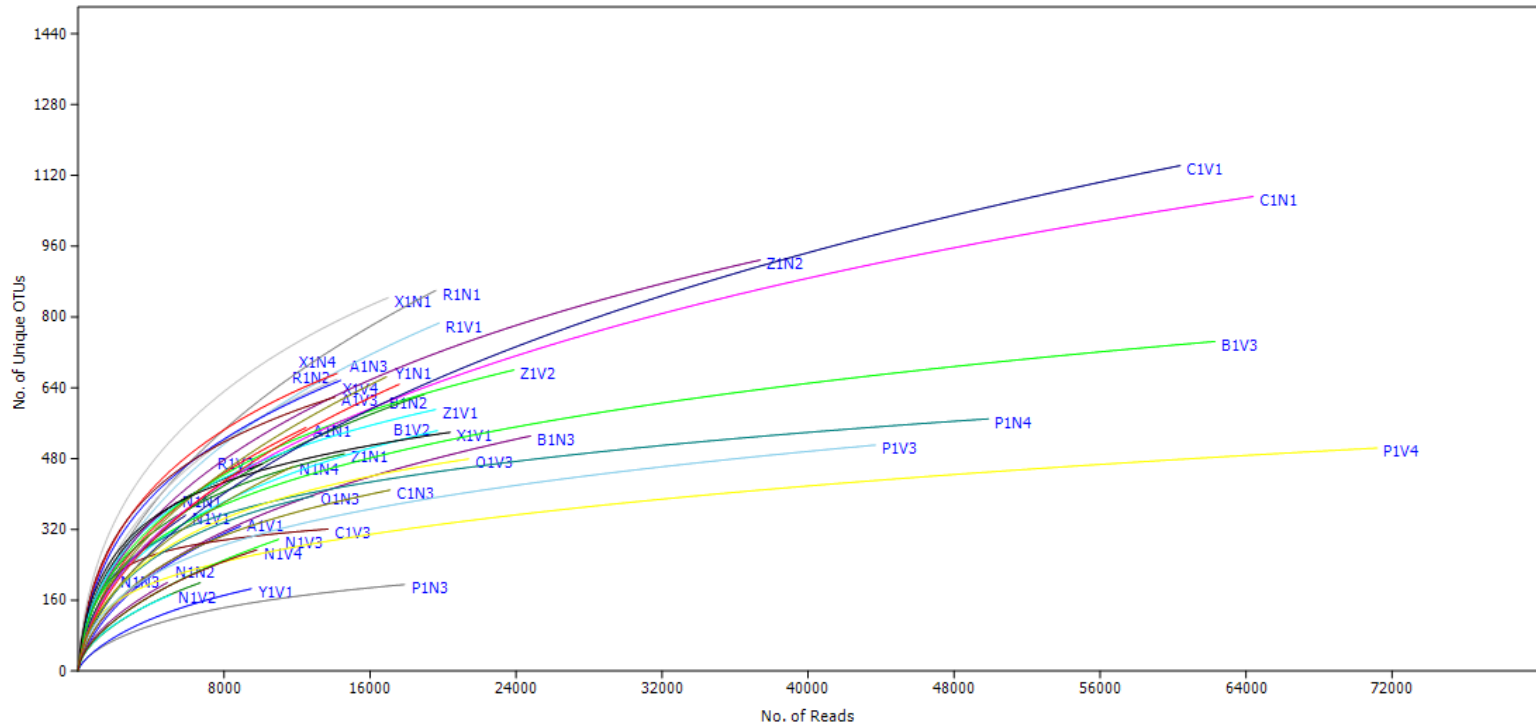

**Figure S1:** Rarefaction plot for all 40 samples of the present study, indicating reasonable coverage for most samples.

# Core skin microbiome of lesional and non-lesional samples

a).

b).

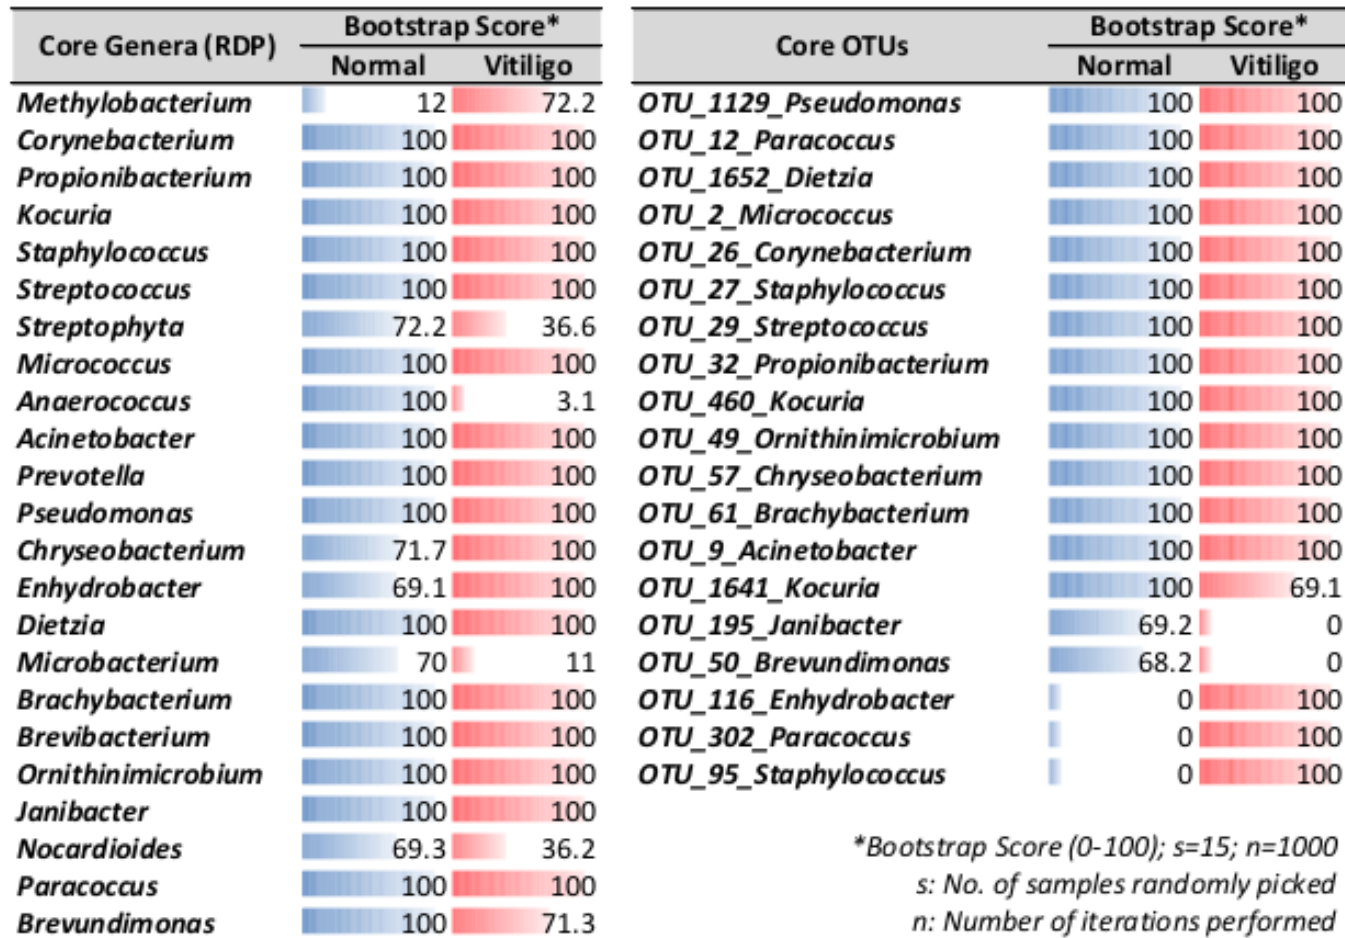

**Figure S2:** Comparison of core-microbial (a) genera and (b) OTUs between Non-Lesional and Lesional samples. Identification of core taxa (genera/OTUs) was done using a bootstrapping approach, wherein a random subset (i.e. 75% of samples) were drawn from the whole set of samples, and core microbial taxa were deduced from the randomly drawn sample set. This approach was iterated 1000 times to arrive at 1000 sets of core microbial taxa for the whole sample set. A union of core taxa for all 1000 iterations was generated and a bootstrap score was assigned to each taxon based upon its consistency in appearing as core taxon in all iterations. Bootstrap score was scaled between 0-100, wherein a score of 100 for a taxon indicated that the given taxon appeared as core in all 1000 iterations. In this study, only those taxa were considered as core which had minimum bootstrap score of 50. In this figure, each bar (blue, red) signifies the bootstrap score for the corresponding genus/OTU identified as core. (Blue: Normal/Non-lesional and Red: Vitiligo/Lesional)

# Principal component analysis (PCoA) of lesional and non-lesional bacterial communities

a).

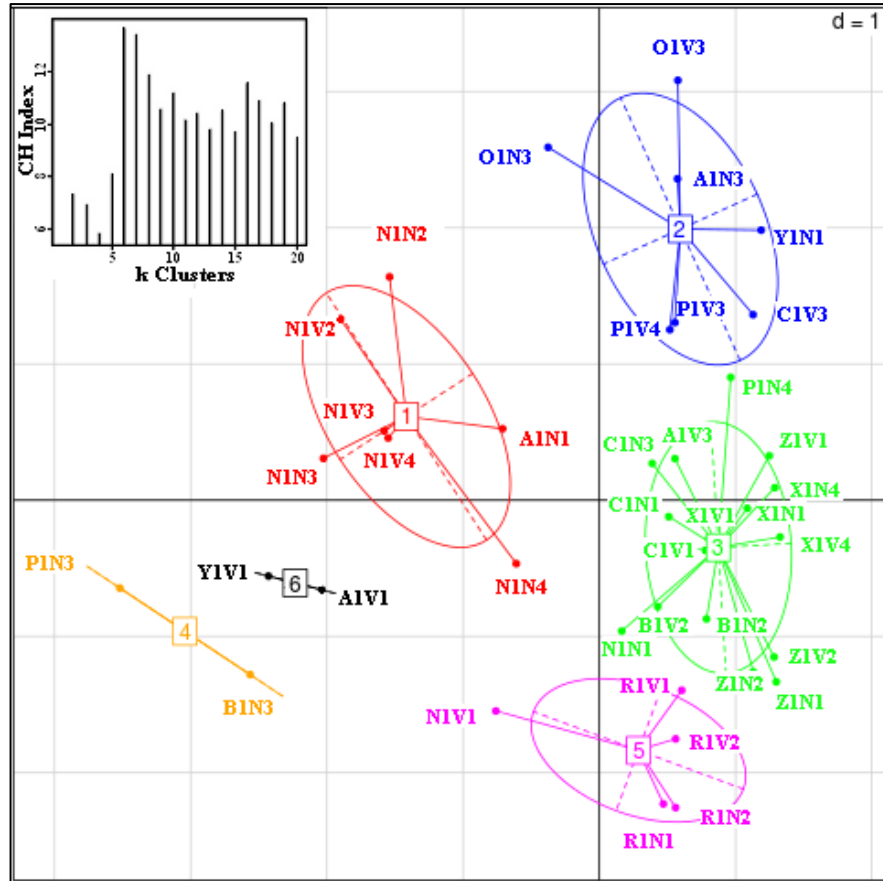

b).

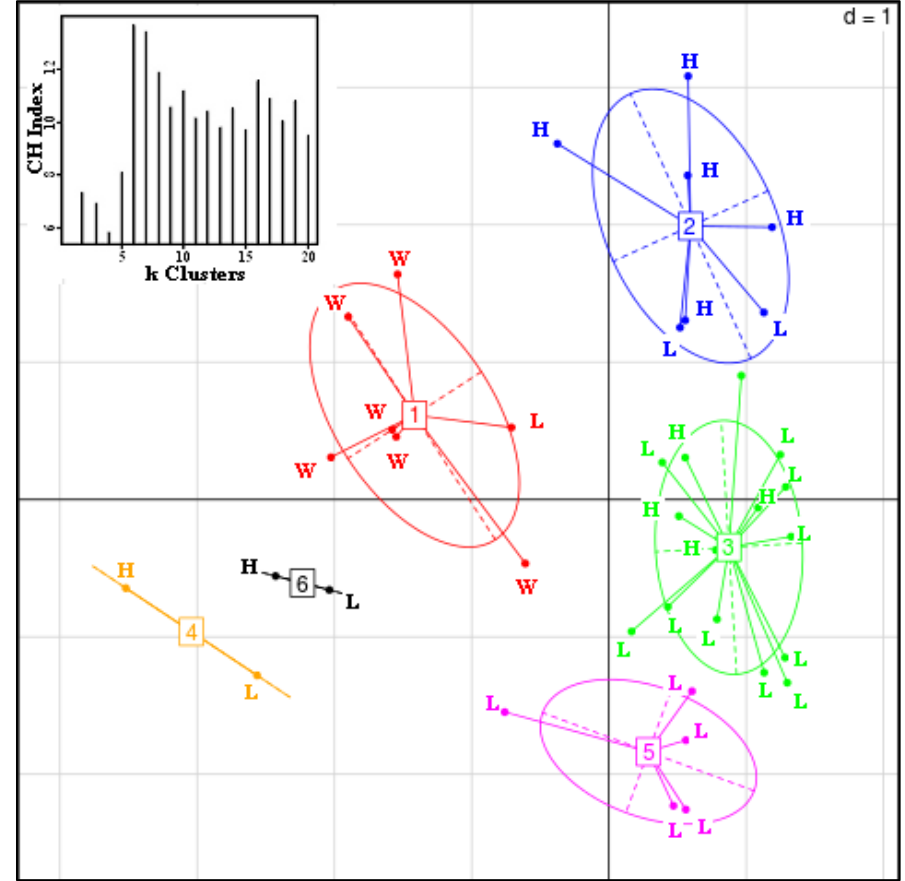

**Figure S3:** a) PCoA analysis visualizing the results from PCA and clustering of Non-Lesional (N) and Lesional (V) samples. (b) PCoA analysis visualizing the results from PCA and clustering of all samples of the present study, tagged according to the site of sampling. Samples were clustered using Jensen–Shannon distance and partitioning around medoid (PAM) clustering. Inset represents the results of optimal number of clusters estimation based on Calinski–Harabasz (CH) index.

a).

## Intra-community network analysis: Non-lesional skin

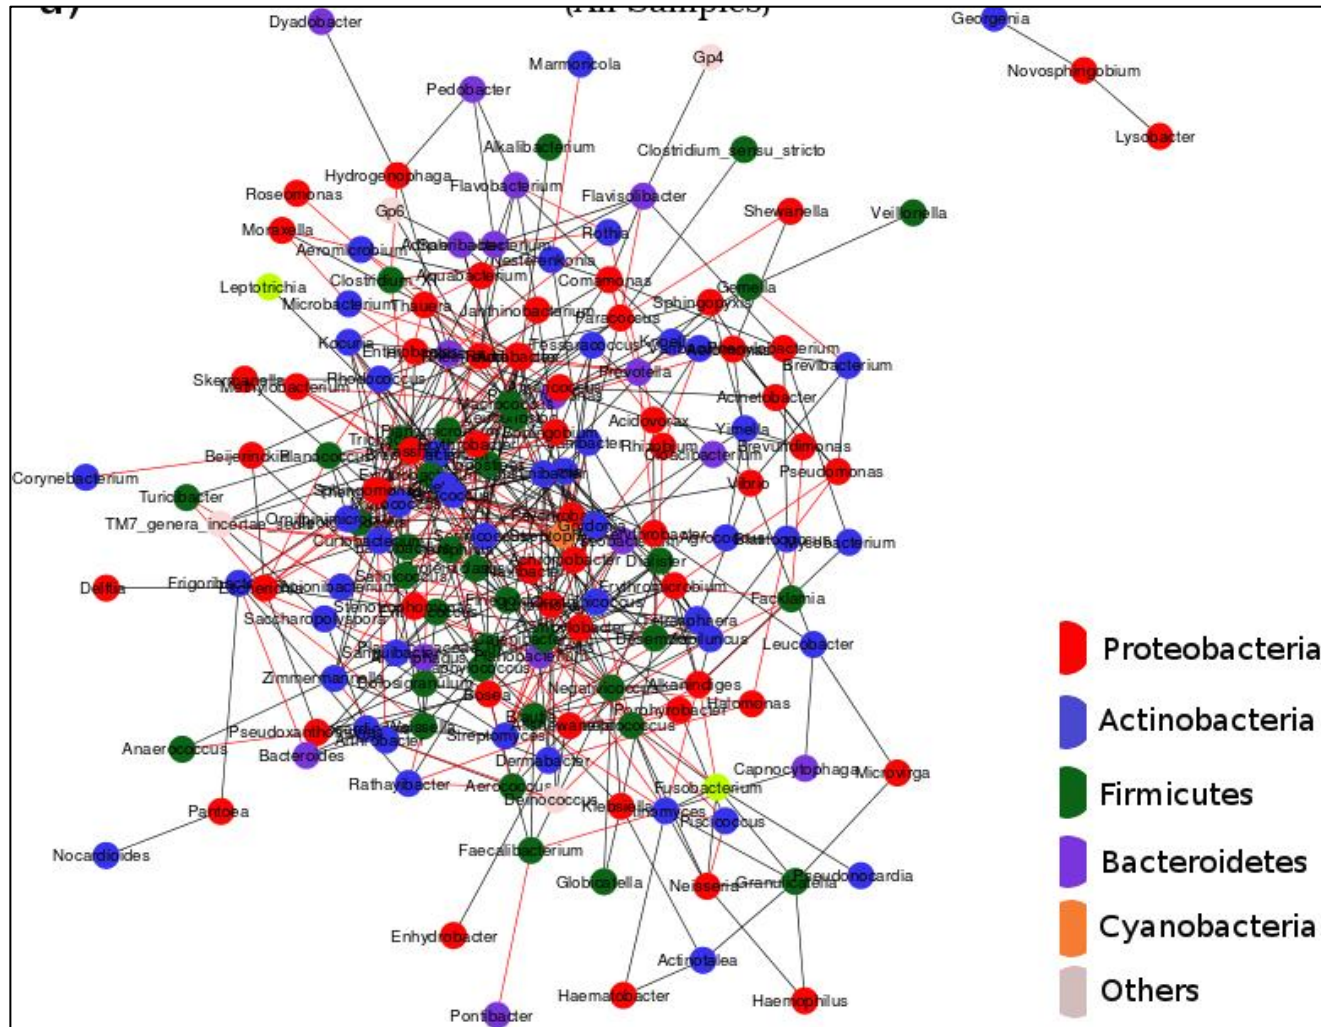

**Figure S4a:** Spearman correlation based microbial community interaction network generated for non-lesional samples. Nodes have been colored according to the phylum level affiliation of the network members, wherein each network member represents a microbial genus.

b).

## Intra-community network analysis: Lesional skin

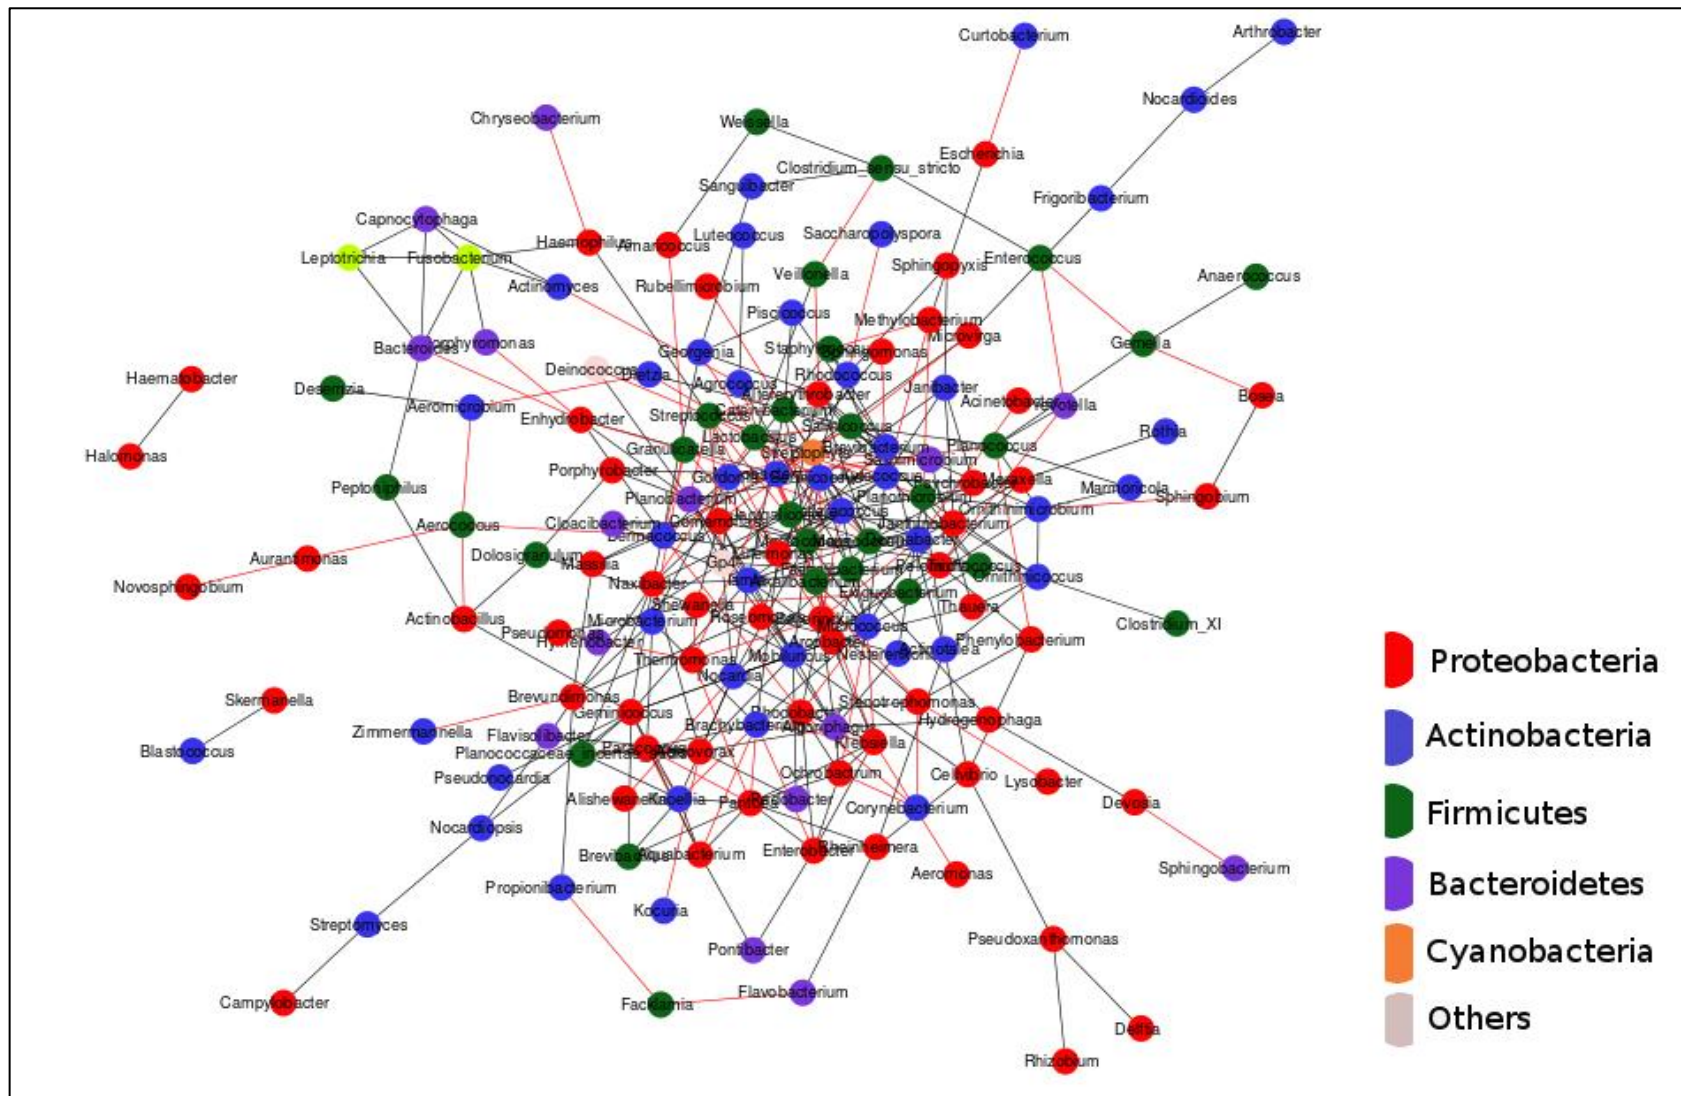

**Figure S4b:** Spearman correlation based microbial community interaction network generated for lesional samples. Nodes have been colored according to the phylum level affiliation of the network members, wherein each network members represents a microbial genus.



## Sampling locations from Vitiligo subjects used in this study

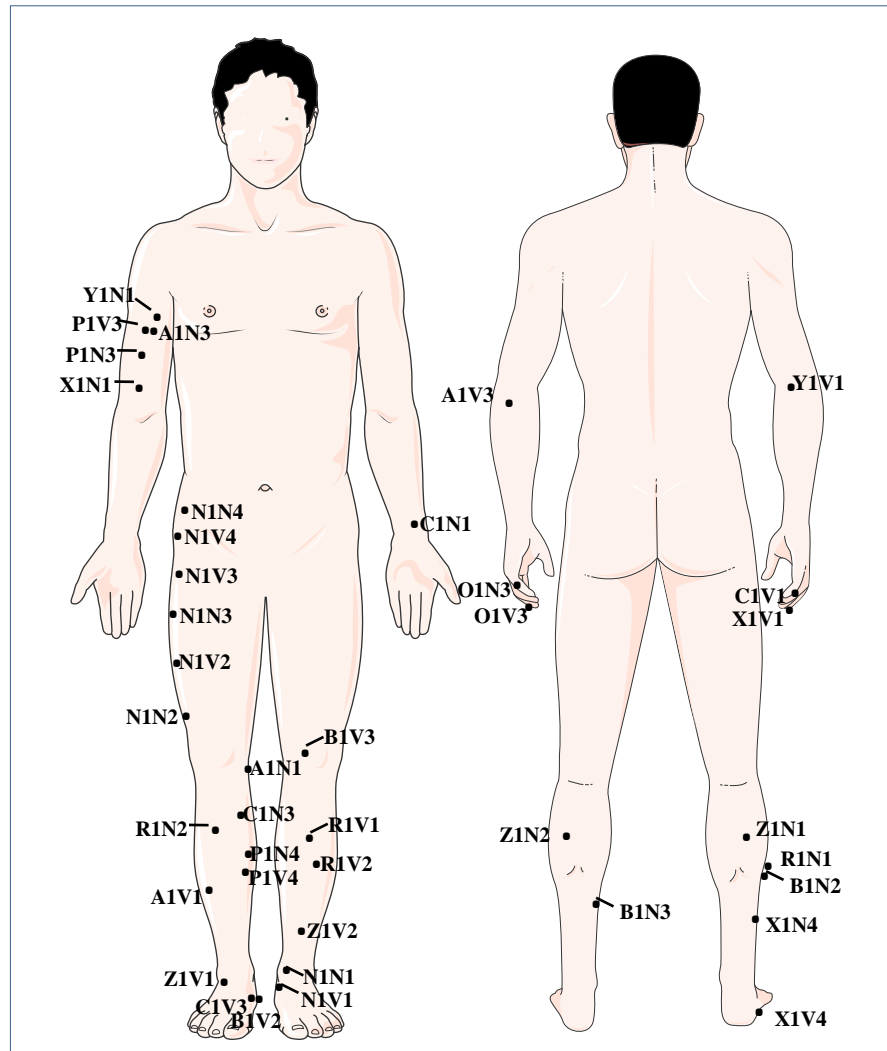

**Figure S5:** Various sampling locations along with corresponding identifier tags that have been referred to in this study/document. Sample nomenclature was as follow: **Subject ID-involved versus uninvolved site-site number**. For example, A1N1 means sample has been obtained from non-lesional (normal) skin of subject A1 at site 1. Corresponding sample from lesional (vitiliginous) skin close to site 1 would be A1V1. (Image adapted from Servier Medical Art Tools: <http://www.servier.com/Powerpoint-image-bank>)

# Schematic description of the algorithm used for Taxonomic assignment of individual OTU clusters

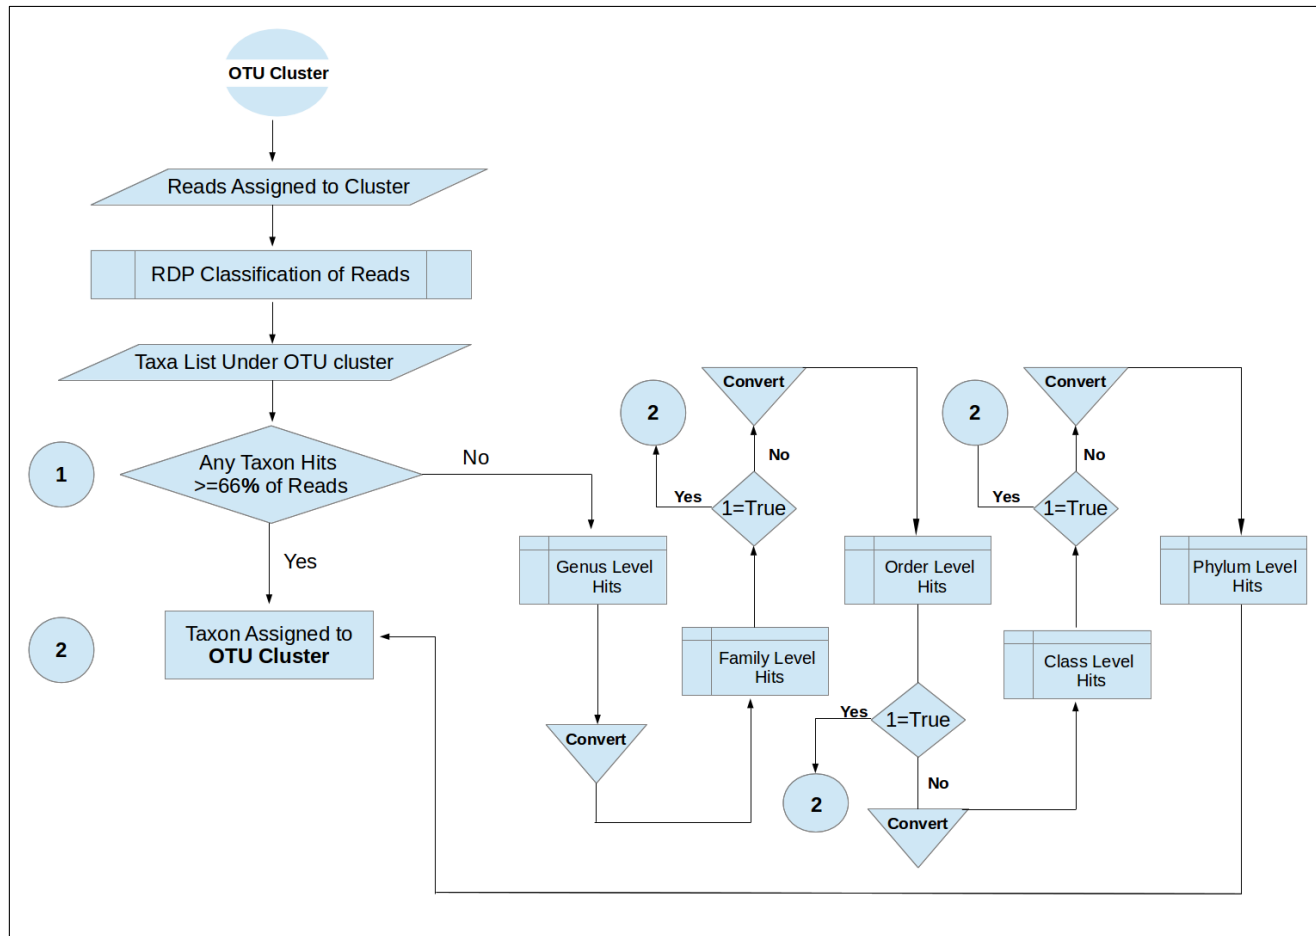

**Figure S6:** The assignment process proceeds in the following manner. If greater than two-thirds of reads in a cluster had an identical taxonomic assignment (i.e. classified by RDP to the same taxon), the OTU cluster is assigned to that taxon. In the event of any taxon in a cluster not attaining a cumulative percentage of 66%, all genus level assignments in that cluster are re-assigned to their immediately higher taxonomic level (i.e. corresponding family level), and the process of checking if any taxon exceeded 66% is repeated. This process is iterated until all clusters obtain a taxonomic assignment

# Community composition of lesional and non-lesional skin of Vitiligo subjects. Samples were obtained from anatomically similar sites.

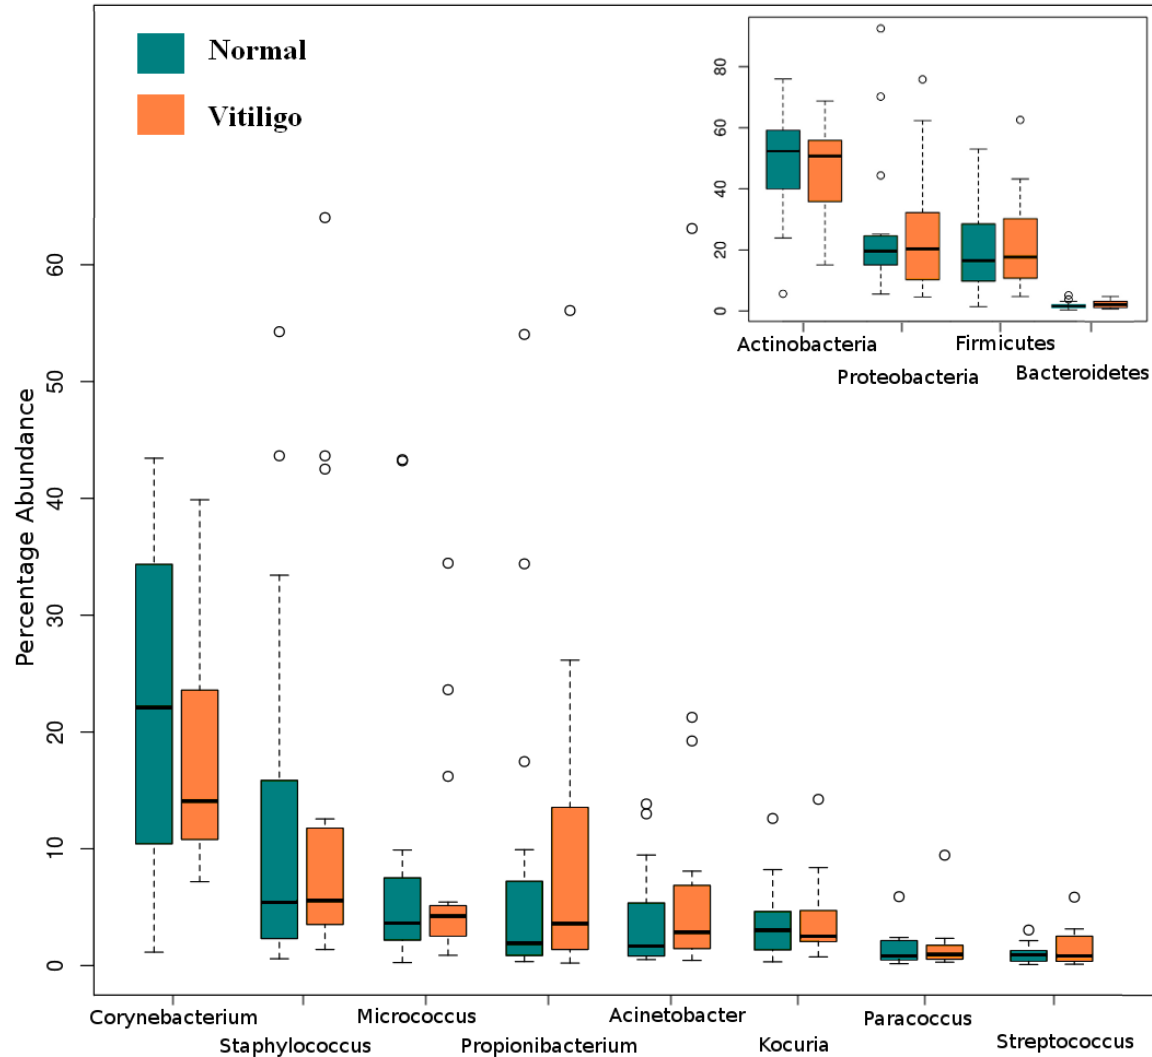

**Figure S7:** Box-plots representing relative abundance analysis of the bacterial taxa discovered in samples obtained from anatomically similar Non-Lesional (Normal) and Lesional (Vitiligo) sites at genus (main) and phylum (inset) levels. Taxa with minimum median abundance of 1% were used for the comparison. The results depicted in the above figure indicate that the microbial abundances observed in the subset of samples (30) from anatomically similar skin sites are similar to that observed during analysis of the whole sample set (40 samples).

# $\alpha$ -diversity trends in lesional (Vitiligo) and non-lesional (Normal) skin samples taken from anatomically similar sites

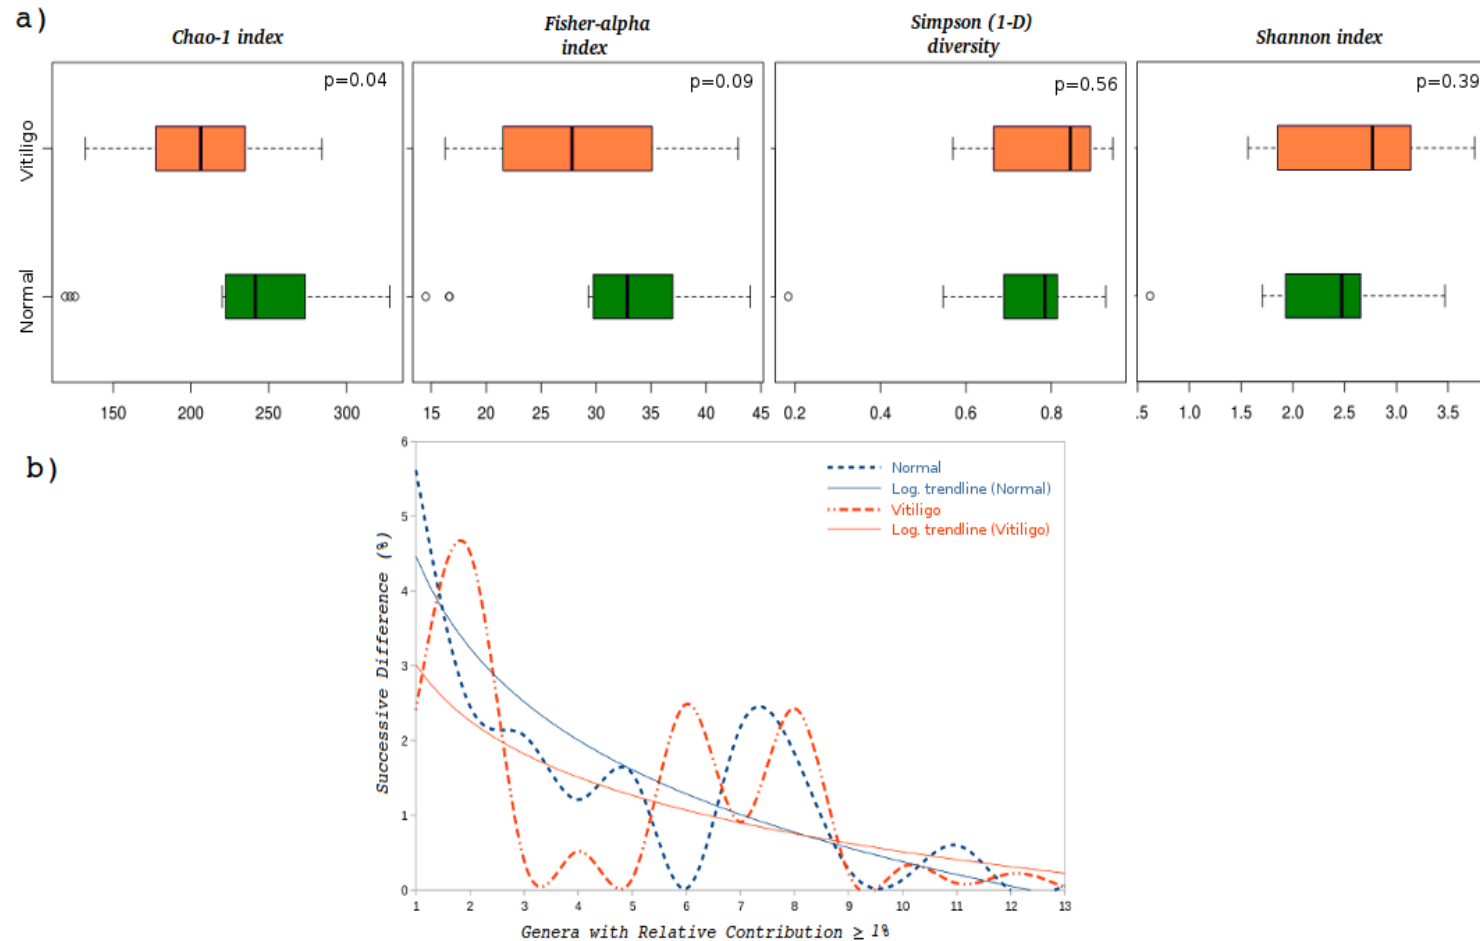

**Figure S8:** a) Box-plots illustrating the comparison of diversity indices (Chao-1, Fisher, Simpson1-D and Shannon index) between Non-Lesional and Lesional samples from anatomically similar sites.

b) Comparison of differences between successive relative contribution values (of the ordered genera) in Non-Lesional and Lesional samples. Only those genera were considered for calculating successive differences in relative contributions that had a minimum relative contribution of 1%. Consistent with the previously observed results for overall population, diversity analysis using the subset of samples from anatomically similar sites indicate similar pattern with respect to various diversity metrics.

## Core microbiota comparison between lesional and non-lesional skin of vitiligo subjects. The samples were taken from anatomically similar sites.

| a) | Core OTUs                        | Bootstrap score * |          | b) | Core Genera (RDP)         | Bootstrap score * |          |
|----|----------------------------------|-------------------|----------|----|---------------------------|-------------------|----------|
|    |                                  | Normal            | Vitiligo |    |                           | Normal            | Vitiligo |
|    | <i>OTU_2_Micrococcus</i>         | 100               | 100      |    | <i>Kocuria</i>            | 100               | 100      |
|    | <i>OTU_9_Acinetobacter</i>       | 100               | 100      |    | <i>Micrococcus</i>        | 100               | 100      |
|    | <i>OTU_12_Paracoccus</i>         | 100               | 100      |    | <i>Ornithinimicrobium</i> | 100               | 100      |
|    | <i>OTU_26_Corynebacterium</i>    | 100               | 100      |    | <i>Paracoccus</i>         | 100               | 100      |
|    | <i>OTU_27_Staphylococcus</i>     | 100               | 100      |    | <i>Prevotella</i>         | 100               | 100      |
|    | <i>OTU_29_Streptococcus</i>      | 100               | 100      |    | <i>Propionibacterium</i>  | 100               | 100      |
|    | <i>OTU_32_Propionibacterium</i>  | 100               | 100      |    | <i>Pseudomonas</i>        | 100               | 100      |
|    | <i>OTU_49_Ornithinimicrobium</i> | 100               | 100      |    | <i>Staphylococcus</i>     | 100               | 100      |
|    | <i>OTU_57_Chryseobacterium</i>   | 100               | 100      |    | <i>Streptococcus</i>      | 100               | 100      |
|    | <i>OTU_61_Brachybacterium</i>    | 100               | 100      |    | <i>Chryseobacterium</i>   | 100               | 100      |
|    | <i>OTU_95_Staphylococcus</i>     | 100               | 100      |    | <i>Corynebacterium</i>    | 100               | 100      |
|    | <i>OTU_460_Kocuria</i>           | 100               | 100      |    | <i>Dietzia</i>            | 100               | 100      |
|    | <i>OTU_1129_Pseudomonas</i>      | 100               | 100      |    | <i>Brachybacterium</i>    | 100               | 100      |
|    | <i>OTU_1641_Kocuria</i>          | 100               | 100      |    | <i>Brevibacterium</i>     | 100               | 100      |
|    | <i>OTU_1652_Dietzia</i>          | 100               | 100      |    | <i>Acinetobacter</i>      | 100               | 100      |
|    | <i>OTU_302_Paracoccus</i>        | 62.9              | 100      |    | <i>Janibacter</i>         | 100               | 65.7     |
|    | <i>OTU_662_Brachybacterium</i>   | 62                | 62.8     |    | <i>Brevundimonas</i>      | 64.3              | 63.9     |
|    | <i>OTU_50_Brevundimonas</i>      | 60.7              | 64.6     |    | <i>Enhydrobacter</i>      | 0                 | 100      |
|    | <i>OTU_195_Janibacter</i>        | 62.9              | 0        |    | <i>Anaerococcus</i>       | 64.1              | 0        |
|    | <i>OTU_116_Enhydrobacter</i>     | 0                 | 100      |    |                           |                   |          |
|    | <i>OTU_38_Intrasporangiaceae</i> | 0                 | 64       |    |                           |                   |          |
|    | <i>OTU_160_Porphyrabacter</i>    | 0                 | 61       |    |                           |                   |          |

Bootstrap Score (0-100); s=11; n=1000  
s: No. of samples randomly picked  
n: Number of iterations performed

**Figure S9:** Comparison of core-microbial (a) OTUs and (b) RDP genera between Non-Lesional (Normal) and Lesional (Vitiligo) samples taken from anatomically similar sites. Identification of core taxa (genera/OTUs) was done using the bootstrapping approach. Normal and Vitiligo samples pertaining to anatomically similar sites were observed to share a fairly common core taxa profile (18 OTUs and 17 RDP genera constituting the common core). OTUs pertaining to *Enhydrobacter* (OTU-116), *Intrasporangiaceae* (OTU-38), and *Porphyrabacter* (OTU-160) were observed to be the 'Core' set exclusive to Vitiligo samples. The RDP taxon corresponding to *Enhydrobacter* was observed to be a genus that is 'Core' exclusively in Vitiligo samples. The results with the samples corresponding to anatomically similar sites were observed to have good similarity with results obtained with the complete set of samples.

# Ordination Analysis of cutaneous microbiome of lesional and non-lesional skin. The samples were taken from anatomically similar sites

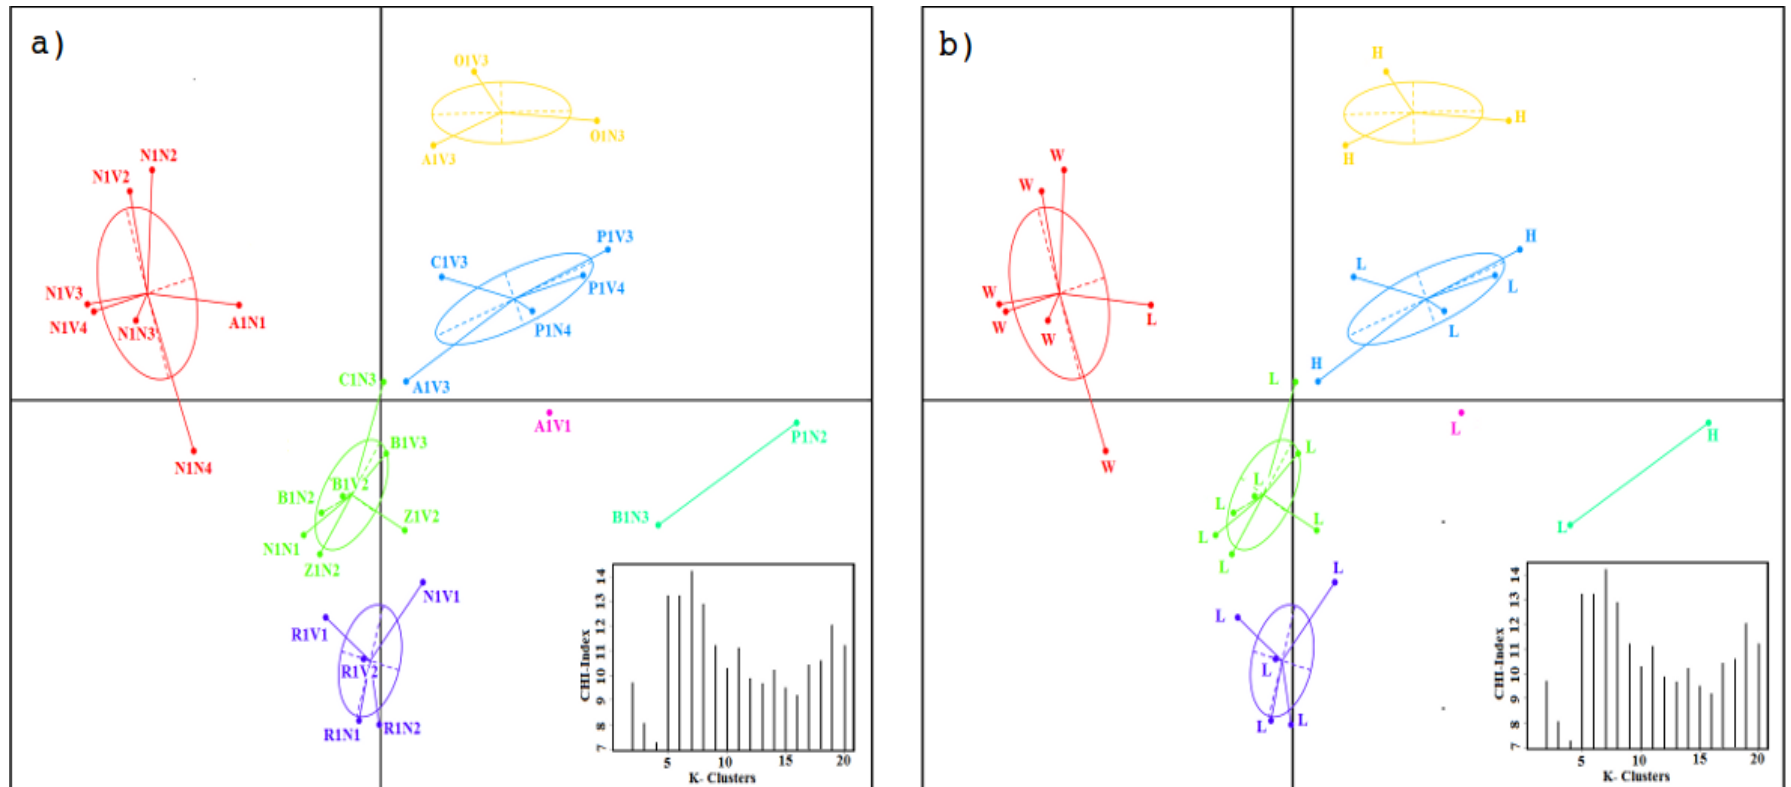

**Figure S10:** a) PCoA analysis visualizing the results from PCA and clustering of Non-Lesional (N) and Lesional (V) samples taken from anatomically similar sites. (b) PCoA analysis visualizing the results from PCA and clustering of samples taken from anatomically similar sites tagged according to the site of sampling. Samples were clustered using Jensen–Shannon distance and partitioning around medoid (PAM) clustering. Inset represents the results of optimal number of clusters estimation based on Calinski–Harabasz (CH) index. As seen in the earlier results obtained with the complete set of samples, ordination analysis performed with the subset of samples from anatomically similar sites also indicates a clustering pattern based on subjects rather than disease status thereby suggesting individual-specific microbiome signatures

# Differentiating taxa of lesional and non-lesional skin. The samples were taken from anatomically similar sites.

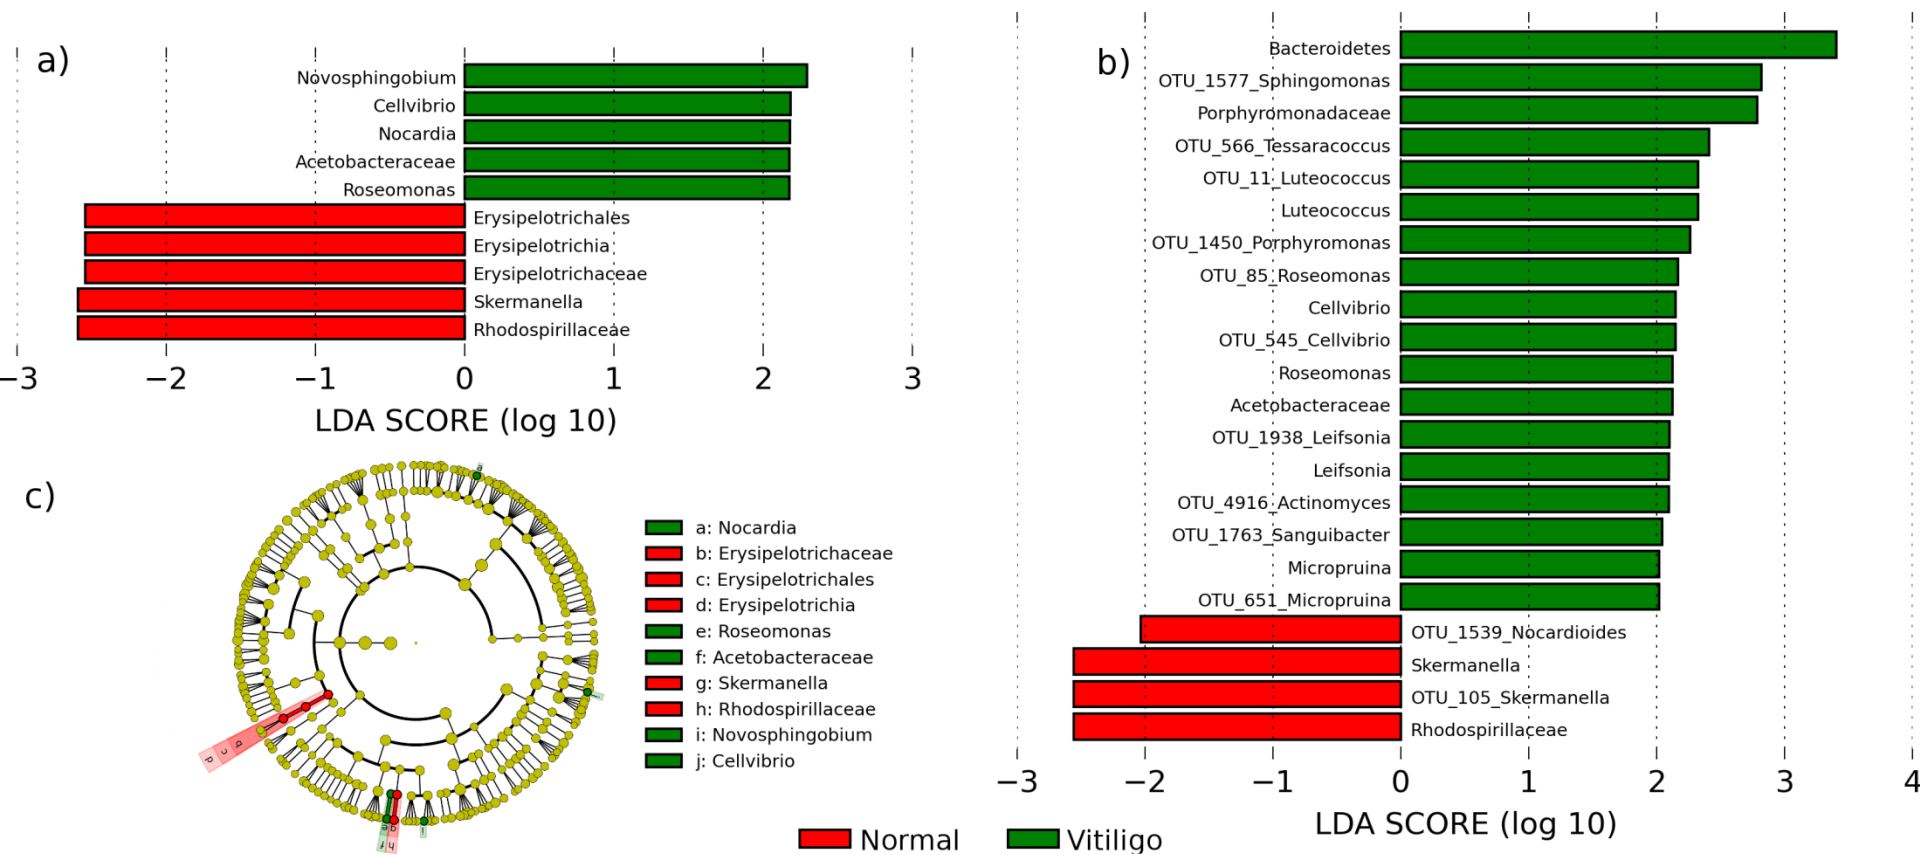

**Figure S11:** Comparison of LDA effect size of the significantly differentiating microbial taxa (a) RDP level and (b) OTU level between Non-Lesional and Lesional samples. LefSe package was used to generate the LDA effect size with LDA cut-off = 2. Wilcoxon p value cut-off of 0.1 was used for differentiating feature analysis through LefSe.. c) Cladogram illustrating the phylogenetic relationship amongst the significantly differentiating microbial taxa (RDP level) between Non-Lesional and Lesional samples, deduced using LefSe package.

# Comparison between lesional and non-lesional bacterial composition using Intra-community network analysis. The samples were taken from anatomically similar sites.

a).

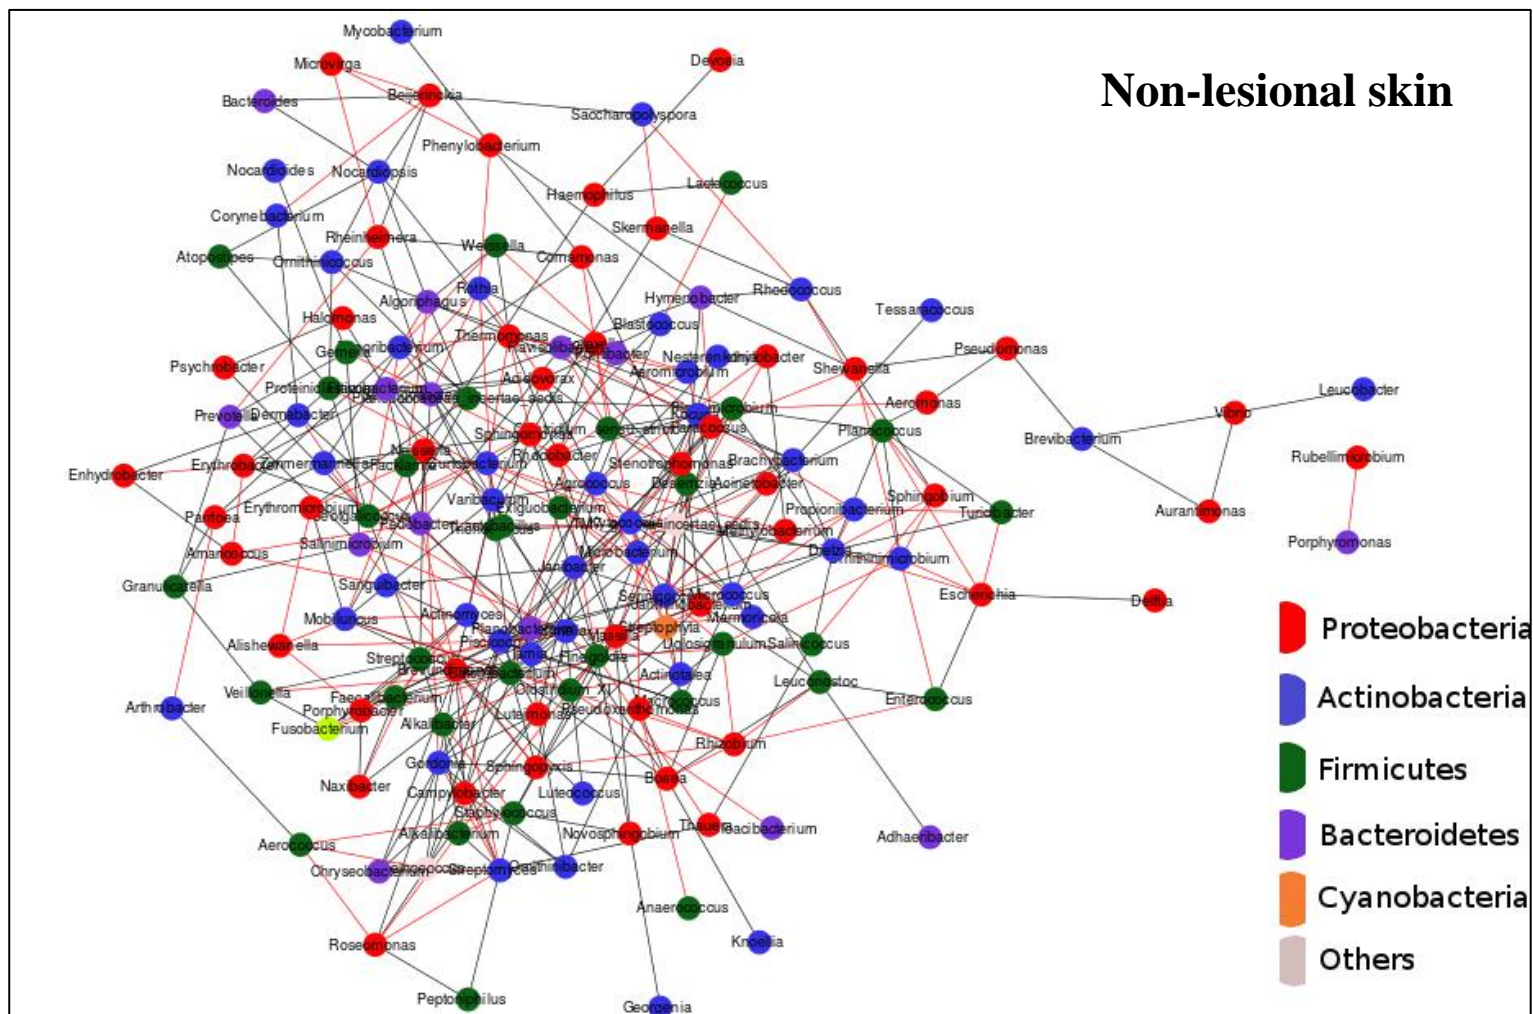

**Figure S12a:** Spearman correlation based microbial community interaction network generated for non-lesional samples. Nodes have been colored according to the phylum level affiliation of the network members, wherein each network member represents a microbial genus. Also refer to supplementary table S3b.



# Comparison between lesional and non-lesional bacterial composition using Intra-community network analysis. The samples were taken from anatomically similar sites.

b).

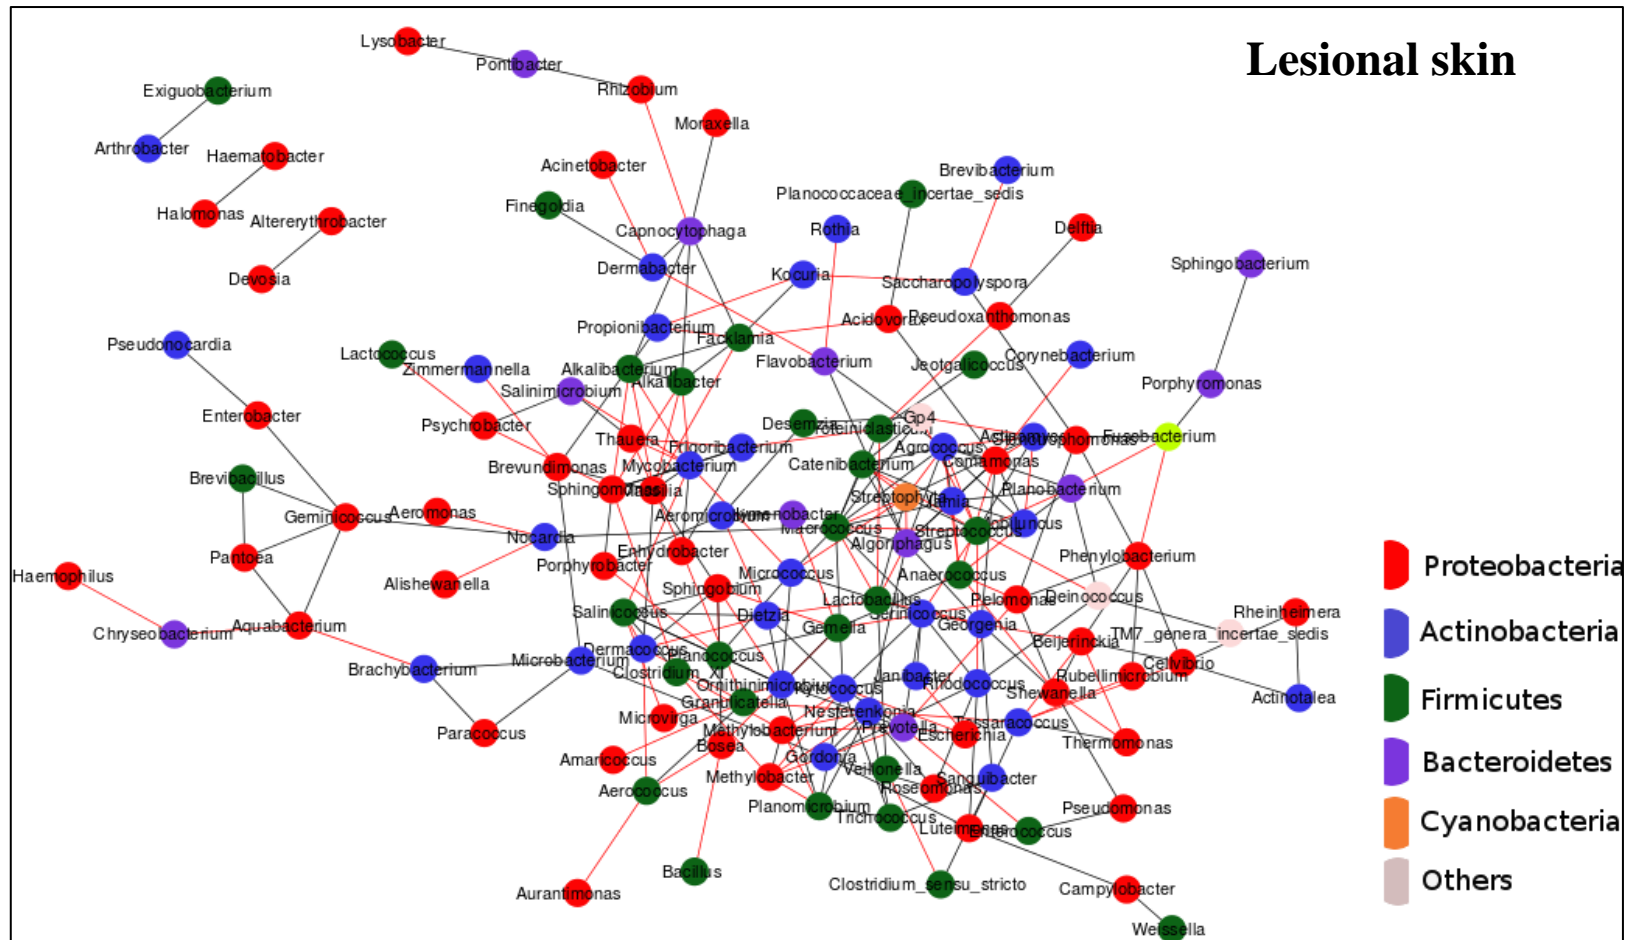

**Figure S12b:** Spearman correlation based microbial community interaction network generated for non-lesional samples. Nodes have been colored according to the phylum level affiliation of the network members, wherein each network members represents a microbial genus.

# Intra-community network analysis of cutaneous microbiota. The samples were taken from anatomically similar sites.

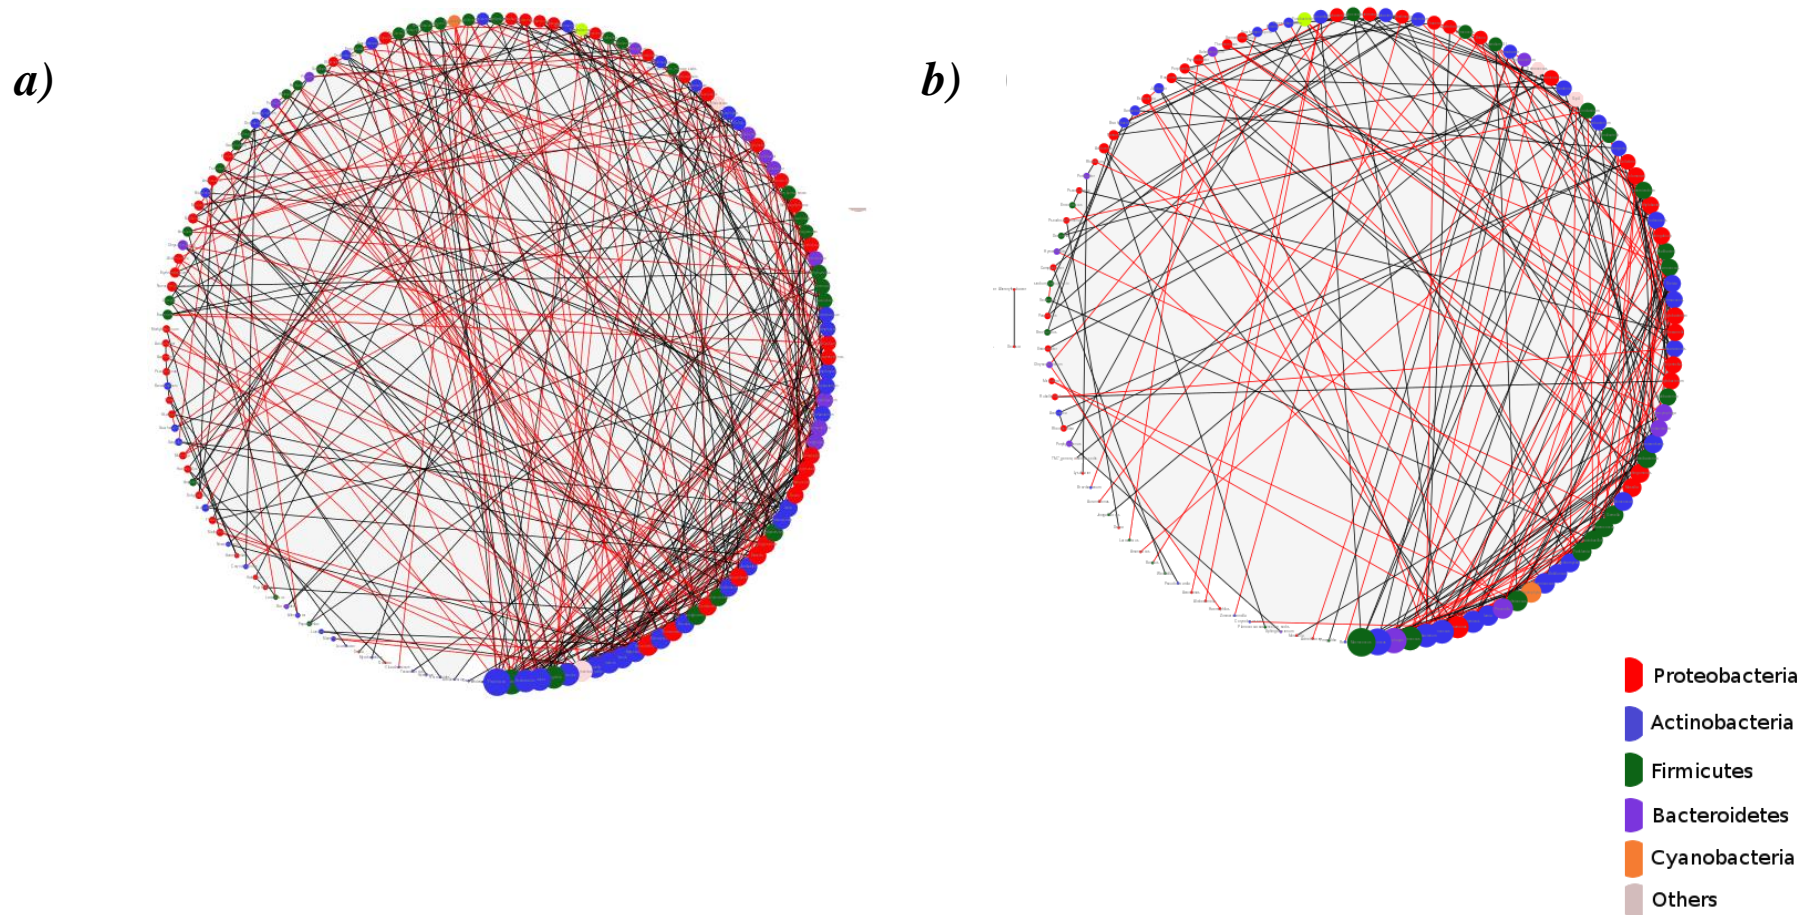

**Figure S13** Degree sorted circular layout of the networks generated for (a) Non-Lesional and (b) Lesional sample sets taken from anatomically similar sites. Nodes are sorted according to their degree in such a way that the size of the node serves as an index of the magnitude of its degree. Color of the nodes represents their phylum affiliation.

**Table S1:** Good's coverage estimate for sampling completeness for all samples

| Sample Name | Good's Coverage Value |
|-------------|-----------------------|
| A1N1        | 0.98                  |
| A1V1        | 0.982                 |
| B1N2        | 0.986                 |
| B1V2        | 0.99                  |
| B1N3        | 0.991                 |
| B1V3        | 0.996                 |
| C1N3        | 0.992                 |
| C1V3        | 0.997                 |
| N1N1        | 0.971                 |
| N1V1        | 0.973                 |
| P1N4        | 0.997                 |
| P1V4        | 0.998                 |
| R1N1        | 0.979                 |
| R1V1        | 0.982                 |
| R1N2        | 0.983                 |
| R1V2        | 0.986                 |
| X1N4        | 0.984                 |
| X1V4        | 0.983                 |
| Z1N1        | 0.99                  |
| Z1V1        | 0.991                 |
| Z1N2        | 0.991                 |
| Z1V2        | 0.99                  |
| A1N3        | 0.98                  |
| A1V3        | 0.987                 |
| C1N1        | 0.994                 |
| C1V1        | 0.992                 |
| O1N3        | 0.991                 |
| O1V3        | 0.994                 |
| P1N3        | 0.996                 |
| P1V3        | 0.996                 |
| X1N1        | 0.983                 |
| X1V1        | 0.994                 |
| Y1N1        | 0.982                 |

|      |       |
|------|-------|
| Y1V1 | 0.991 |
| N1N2 | 0.986 |
| N1V2 | 0.983 |
| N1N3 | 0.977 |
| N1V3 | 0.986 |
| N1N4 | 0.981 |
| N1V4 | 0.987 |

**Table S2:** Summary of 'number of taxa' at various ranges of relative contribution

| Relative Contribution (%) | No. of Genera<br>(% w.r.t total no. of taxa) |            |
|---------------------------|----------------------------------------------|------------|
|                           | Non-Lesional                                 | Lesional   |
| ≥1.00                     | 12 (1.9)                                     | 16 (2.8)   |
| ≥0.10                     | 58 (9.5)                                     | 83 (14.3)  |
| ≥0.01                     | 216 (35.3)                                   | 226 (39.0) |

  

| Relative Contribution (%) | No. of Families<br>(% w.r.t total no. of taxa) |            |
|---------------------------|------------------------------------------------|------------|
|                           | Non-Lesional                                   | Lesional   |
| ≥1.00                     | 12 (6.9)                                       | 18 (10.7)  |
| ≥0.10                     | 55 (31.4)                                      | 59 (35.1)  |
| ≥0.01                     | 113 (64.6)                                     | 114 (67.9) |

**Table S3:** Comparison of properties of lesional and non-lesional microbial community networks. a) All samples, (b) Samples from anatomically similar sites

a)

| Network Properties     | Samples      |          |
|------------------------|--------------|----------|
|                        | Non-Lesional | Lesional |
| Nodes                  | 162          | 151      |
| Edges                  | 511          | 348      |
| Average Degree         | 6.27         | 4.58     |
| Shortest Path Length   | 3.35         | 3.96     |
| Clustering Coefficient | 0.28         | 0.26     |

b)

| Network Properties     | Samples      |          |
|------------------------|--------------|----------|
|                        | Non-Lesional | Lesional |
| Nodes                  | 148          | 127      |
| Edges                  | 407          | 259      |
| Average Degree         | 5.46         | 4.05     |
| Shortest Path Length   | 3.67         | 4.32     |
| Clustering Coefficient | 0.30         | 0.31     |

**Table S4a:** Comparison of various Phylogenetic and Phenotypic properties of top degree nodes of the microbial community interaction network for Non-lesional datasets of present study.

| <i>Phenotypes</i>     | <b>Degree Threshold</b> |             |             |             |             |             |
|-----------------------|-------------------------|-------------|-------------|-------------|-------------|-------------|
| <i>Phylum</i>         | <b>70.0</b>             | <b>75.0</b> | <b>80.0</b> | <b>85.0</b> | <b>90.0</b> | <b>95.0</b> |
| Actinobacteria        | 46.7                    | 45.5        | 42.9        | 50.0        | 66.7        | 100.0       |
| Bacteroidetes         | 6.7                     | 0.0         | 0.0         | 0.0         | 0.0         | 0.0         |
| Firmicutes            | 26.7                    | 27.3        | 42.9        | 50.0        | 33.3        | 0.0         |
| Proteobacteria        | 20.0                    | 27.3        | 14.3        | 0.0         | 0.0         | 0.0         |
|                       |                         |             |             |             |             |             |
| <i>Class</i>          | <b>70.0</b>             | <b>75.0</b> | <b>80.0</b> | <b>85.0</b> | <b>90.0</b> | <b>95.0</b> |
| Actinobacteria        | 46.7                    | 45.5        | 42.9        | 50.0        | 66.7        | 100.0       |
| Alphaproteobacteria   | 6.7                     | 9.1         | 14.3        | 0.0         | 0.0         | 0.0         |
| Bacilli               | 13.3                    | 18.2        | 28.6        | 25.0        | 0.0         | 0.0         |
| Epsilonproteobacteria | 6.7                     | 9.1         | 0.0         | 0.0         | 0.0         | 0.0         |
| Erysipelotrichia      | 6.7                     | 9.1         | 14.3        | 25.0        | 33.3        | 0.0         |
| Flavobacteria         | 6.7                     | 0.0         | 0.0         | 0.0         | 0.0         | 0.0         |
| Gammaproteobacteria   | 6.7                     | 9.1         | 0.0         | 0.0         | 0.0         | 0.0         |
| Negativicutes         | 6.7                     | 0.0         | 0.0         | 0.0         | 0.0         | 0.0         |
|                       |                         |             |             |             |             |             |
| <i>Order</i>          | <b>70.0</b>             | <b>75.0</b> | <b>80.0</b> | <b>85.0</b> | <b>90.0</b> | <b>95.0</b> |
| Acidimicrobiales      | 6.7                     | 9.1         | 14.3        | 25.0        | 33.3        | 50.0        |
| Actinomycetales       | 40.0                    | 36.4        | 28.6        | 25.0        | 33.3        | 50.0        |
| Bacillales            | 6.7                     | 9.1         | 14.3        | 0.0         | 0.0         | 0.0         |
| Campylobacterales     | 6.7                     | 9.1         | 0.0         | 0.0         | 0.0         | 0.0         |
| Erysipelotrichales    | 6.7                     | 9.1         | 14.3        | 25.0        | 33.3        | 0.0         |
| Flavobacteriales      | 6.7                     | 0.0         | 0.0         | 0.0         | 0.0         | 0.0         |
| Lactobacillales       | 6.7                     | 9.1         | 14.3        | 25.0        | 0.0         | 0.0         |
| Selenomonadales       | 6.7                     | 0.0         | 0.0         | 0.0         | 0.0         | 0.0         |
| Sphingomonadales      | 6.7                     | 9.1         | 14.3        | 0.0         | 0.0         | 0.0         |
| Xanthomonadales       | 6.7                     | 9.1         | 0.0         | 0.0         | 0.0         | 0.0         |
|                       |                         |             |             |             |             |             |
| <i>Family</i>         | <b>70.0</b>             | <b>75.0</b> | <b>80.0</b> | <b>85.0</b> | <b>90.0</b> | <b>95.0</b> |
| Campylobacteraceae    | 6.7                     | 9.1         | 0.0         | 0.0         | 0.0         | 0.0         |
| Carnobacteriaceae     | 6.7                     | 9.1         | 14.3        | 25.0        | 0.0         | 0.0         |
| Dermabacteraceae      | 6.7                     | 9.1         | 14.3        | 25.0        | 33.3        | 50.0        |
| Dermacoccaceae        | 6.7                     | 9.1         | 14.3        | 0.0         | 0.0         | 0.0         |
| Dietziaceae           | 6.7                     | 9.1         | 0.0         | 0.0         | 0.0         | 0.0         |
| Erysipelotrichaceae   | 6.7                     | 9.1         | 14.3        | 25.0        | 33.3        | 0.0         |
| Flavobacteriaceae     | 6.7                     | 0.0         | 0.0         | 0.0         | 0.0         | 0.0         |
| Iamiaceae             | 6.7                     | 9.1         | 14.3        | 25.0        | 33.3        | 50.0        |
| Intrasporangiaceae    | 13.3                    | 9.1         | 0.0         | 0.0         | 0.0         | 0.0         |
| Microbacteriaceae     | 6.7                     | 0.0         | 0.0         | 0.0         | 0.0         | 0.0         |
| Sphingomonadaceae     | 6.7                     | 9.1         | 14.3        | 0.0         | 0.0         | 0.0         |

|                           |             |             |             |             |             |             |
|---------------------------|-------------|-------------|-------------|-------------|-------------|-------------|
| Staphylococcaceae         | 6.7         | 9.1         | 14.3        | 0.0         | 0.0         | 0.0         |
| Veillonellaceae           | 6.7         | 0.0         | 0.0         | 0.0         | 0.0         | 0.0         |
| Xanthomonadaceae          | 6.7         | 9.1         | 0.0         | 0.0         | 0.0         | 0.0         |
|                           |             |             |             |             |             |             |
| <b>Cell-Shape</b>         | <b>70.0</b> | <b>75.0</b> | <b>80.0</b> | <b>85.0</b> | <b>90.0</b> | <b>95.0</b> |
| Coccus_shaped             | 26.7        | 18.2        | 28.6        | 0.0         | 0.0         | 0.0         |
| Rod_shaped                | 60.0        | 72.7        | 71.4        | 100.0       | 100.0       | 100.0       |
| Spiral_shaped             | 6.7         | 9.1         | 0.0         | 0.0         | 0.0         | 0.0         |
| Unknown                   | 6.7         | 0.0         | 0.0         | 0.0         | 0.0         | 0.0         |
|                           |             |             |             |             |             |             |
| <b>Gram-Nature</b>        | <b>70.0</b> | <b>75.0</b> | <b>80.0</b> | <b>85.0</b> | <b>90.0</b> | <b>95.0</b> |
| Gram_Negative             | 40.0        | 36.4        | 28.6        | 0.0         | 0.0         | 0.0         |
| Gram_Positive             | 60.0        | 63.6        | 71.4        | 100.0       | 100.0       | 100.0       |
|                           |             |             |             |             |             |             |
| <b>Motility'</b>          | <b>70.0</b> | <b>75.0</b> | <b>80.0</b> | <b>85.0</b> | <b>90.0</b> | <b>95.0</b> |
| Motile                    | 20.0        | 18.2        | 14.3        | 0.0         | 0.0         | 0.0         |
| Nonmotile                 | 53.3        | 54.5        | 57.1        | 50.0        | 66.7        | 50.0        |
| Unknown                   | 26.7        | 27.3        | 28.6        | 50.0        | 33.3        | 50.0        |
|                           |             |             |             |             |             |             |
| <b>Oxygen-Requirement</b> | <b>70.0</b> | <b>75.0</b> | <b>80.0</b> | <b>85.0</b> | <b>90.0</b> | <b>95.0</b> |
| Facultative_Anerobe       | 13.3        | 18.2        | 28.6        | 25.0        | 0.0         | 0.0         |
| Microaerophilic           | 6.7         | 9.1         | 0.0         | 0.0         | 0.0         | 0.0         |
| Obligate_Aerobe           | 60.0        | 63.6        | 57.1        | 50.0        | 66.7        | 100.0       |
| Obligate_Anerobe          | 13.3        | 9.1         | 14.3        | 25.0        | 33.3        | 0.0         |
| Unknown                   | 6.7         | 0.0         | 0.0         | 0.0         | 0.0         | 0.0         |
|                           |             |             |             |             |             |             |
| <b>Sporulation</b>        | <b>70.0</b> | <b>75.0</b> | <b>80.0</b> | <b>85.0</b> | <b>90.0</b> | <b>95.0</b> |
| Nonsporulating            | 60.0        | 54.5        | 71.4        | 50.0        | 66.7        | 50.0        |
| Unknown                   | 40.0        | 45.5        | 28.6        | 50.0        | 33.3        | 50.0        |



**Table S4b:** Comparison of various Phylogenetic and Phenotypic properties of top degree nodes of the microbial community interaction network for Lesional datasets of present study.

| <i>Phenotypes</i>   | <b>Degree Threshold</b> |             |             |             |             |             |
|---------------------|-------------------------|-------------|-------------|-------------|-------------|-------------|
| <b>Phylum</b>       | <b>70.0</b>             | <b>75.0</b> | <b>80.0</b> | <b>85.0</b> | <b>90.0</b> | <b>95.0</b> |
| Actinobacteria      | 62.5                    | 62.5        | 40.0        | 0.0         | 0.0         | 0.0         |
| Firmicutes          | 25.0                    | 25.0        | 40.0        | 100.0       | 100.0       | 100.0       |
| Proteobacteria      | 12.5                    | 12.5        | 20.0        | 0.0         | 0.0         | 0.0         |
|                     |                         |             |             |             |             |             |
| <b>Class</b>        | <b>70.0</b>             | <b>75.0</b> | <b>80.0</b> | <b>85.0</b> | <b>90.0</b> | <b>95.0</b> |
| Actinobacteria      | 62.5                    | 62.5        | 40.0        | 0.0         | 0.0         | 0.0         |
| Bacilli             | 25.0                    | 25.0        | 40.0        | 100.0       | 100.0       | 100.0       |
| Gammaproteobacteria | 12.5                    | 12.5        | 20.0        | 0.0         | 0.0         | 0.0         |
|                     |                         |             |             |             |             |             |
| <b>Order</b>        | <b>70.0</b>             | <b>75.0</b> | <b>80.0</b> | <b>85.0</b> | <b>90.0</b> | <b>95.0</b> |
| Acidimicrobiales    | 12.5                    | 12.5        | 20.0        | 0.0         | 0.0         | 0.0         |
| Actinomycetales     | 50.0                    | 50.0        | 20.0        | 0.0         | 0.0         | 0.0         |
| Bacillales          | 25.0                    | 25.0        | 40.0        | 100.0       | 100.0       | 100.0       |
| Xanthomonadales     | 12.5                    | 12.5        | 20.0        | 0.0         | 0.0         | 0.0         |
|                     |                         |             |             |             |             |             |
| <b>Family</b>       | <b>70.0</b>             | <b>75.0</b> | <b>80.0</b> | <b>85.0</b> | <b>90.0</b> | <b>95.0</b> |
| Actinomycetaceae    | 12.5                    | 12.5        | 0.0         | 0.0         | 0.0         | 0.0         |
| Bacillaceae_2       | 12.5                    | 12.5        | 20.0        | 0.0         | 0.0         | 0.0         |
| Dermacoccaceae      | 12.5                    | 12.5        | 0.0         | 0.0         | 0.0         | 0.0         |
| Iamiaceae           | 12.5                    | 12.5        | 20.0        | 0.0         | 0.0         | 0.0         |
| Intrasporangiaceae  | 12.5                    | 12.5        | 20.0        | 0.0         | 0.0         | 0.0         |
| Micrococcaceae      | 12.5                    | 12.5        | 0.0         | 0.0         | 0.0         | 0.0         |
| Staphylococcaceae   | 12.5                    | 12.5        | 20.0        | 100.0       | 100.0       | 100.0       |
| Xanthomonadaceae    | 12.5                    | 12.5        | 20.0        | 0.0         | 0.0         | 0.0         |
|                     |                         |             |             |             |             |             |
| <b>Cell-Shape</b>   | <b>70.0</b>             | <b>75.0</b> | <b>80.0</b> | <b>85.0</b> | <b>90.0</b> | <b>95.0</b> |
| Coccus_shaped       | 37.5                    | 37.5        | 40.0        | 100.0       | 100.0       | 100.0       |
| Rod_shaped          | 37.5                    | 37.5        | 40.0        | 0.0         | 0.0         | 0.0         |
| Sphere_shaped       | 25.0                    | 25.0        | 20.0        | 0.0         | 0.0         | 0.0         |
|                     |                         |             |             |             |             |             |
| <b>Gram-Nature</b>  | <b>70.0</b>             | <b>75.0</b> | <b>80.0</b> | <b>85.0</b> | <b>90.0</b> | <b>95.0</b> |
| Gram_Negative       | 25.0                    | 25.0        | 40.0        | 100.0       | 100.0       | 100.0       |
| Gram_Positive       | 75.0                    | 75.0        | 60.0        | 0.0         | 0.0         | 0.0         |
|                     |                         |             |             |             |             |             |
| <b>Motility'</b>    | <b>70.0</b>             | <b>75.0</b> | <b>80.0</b> | <b>85.0</b> | <b>90.0</b> | <b>95.0</b> |
| Motile              | 25.0                    | 25.0        | 20.0        | 0.0         | 0.0         | 0.0         |
| Nonmotile           | 50.0                    | 50.0        | 40.0        | 100.0       | 100.0       | 100.0       |
| Unknown             | 25.0                    | 25.0        | 40.0        | 0.0         | 0.0         | 0.0         |

| <b>Oxygen-Requirement</b> | <b>70.0</b> | <b>75.0</b> | <b>80.0</b> | <b>85.0</b> | <b>90.0</b> | <b>95.0</b> |
|---------------------------|-------------|-------------|-------------|-------------|-------------|-------------|
| Facultative_Anerobe       | 12.5        | 12.5        | 20.0        | 100.0       | 100.0       | 100.0       |
| Obligate_Aerobe           | 75.0        | 75.0        | 80.0        | 0.0         | 0.0         | 0.0         |
| Obligate_Anerobe          | 12.5        | 12.5        | 0.0         | 0.0         | 0.0         | 0.0         |
|                           |             |             |             |             |             |             |
| <b>Sporulation</b>        | <b>70.0</b> | <b>75.0</b> | <b>80.0</b> | <b>85.0</b> | <b>90.0</b> | <b>95.0</b> |
| Nonsporulating            | 62.5        | 62.5        | 60.0        | 100.0       | 100.0       | 100.0       |
| Unknown                   | 37.5        | 37.5        | 40.0        | 0.0         | 0.0         | 0.0         |

**Table S5:** Subject information

| <b>PATIENT ID</b> | <b>GENDER/AGE</b> | <b>AGE</b> | <b>TYPE OF VITILIGO</b> |
|-------------------|-------------------|------------|-------------------------|
| C                 | Female            | 29 years   | Non-segmental, Vulgaris |
| O                 | Female            | 23 years   | Non-segmental, Vulgaris |
| A                 | Female            | 30 years   | Non-segmental, Vulgaris |
| P                 | Female            | 42 years   | Non-segmental, Vulgaris |
| B                 | Female            | 28 years   | Non-segmental, Vulgaris |
| Z                 | Female            | 35 years   | Non-segmental, Vulgaris |
| N                 | Male              | 22 years   | Non-segmental, Vulgaris |
| R                 | Male              | 25 years   | Non-segmental, Vulgaris |
| Y                 | Male              | 24 years   | Non-segmental, Vulgaris |
| X                 | Male              | 27 years   | Non-segmental, Vulgaris |

**Table S6:** MID sequences used for primer designing

| <b>Primer No.</b> | <b>MID sequence</b> |
|-------------------|---------------------|
| 27F1              | AGACTCGACGT         |
| 27F2              | AGTACGAGAGT         |
| 27F3              | AGTACTACTAT         |
| 27F4              | AGTAGACGTCT         |
| 27F5              | AGTCGTACACT         |
| 27F6              | GTGTACGACGT         |
| 27F7              | ACACAGTGAGT         |
| 27F8              | ACACTCATACTA        |
| 27F9              | ACAGACAGCGT         |
| 27F10             | ACAGACTATAT         |
| 27F11             | ACAGAGACTCT         |
| 27F12             | ACAGCTCGTGT         |
| 27F13             | ACAGTGTCGAT         |
| 27F14             | ACGAGCGCGCT         |
| 27F15             | ACGATGAGTGT         |
| 27F16             | ACGCGAGAGAT         |
| 27F17             | ACGCTCTCTCT         |
| 27F18             | ACGTCGCTGAT         |
| 27F19             | ACGTCTAGCAT         |
| 27F20             | ACTAGTGATAT         |

**Table S7:** Sample Ids, sampling sites and primers used for each sample in this study

| <b>Region A</b> |           |      |
|-----------------|-----------|------|
| Primer          | Sample ID | Site |
| 27F1            | Y1N1      | Hand |
| 27F2            | Y1V1      |      |
| 27F3            | B1N2      | Leg  |
| 27F4            | B1V2      |      |
| 27F5            | B1N3      | Leg  |
| 27F6            | B1V3      |      |
| 27F7            | C1N1      | Hand |
| 27F8            | C1V1      |      |
| 27F9            | Z1N2      | Leg  |
| 27F10           | Z1V2      |      |
| 27F11           | C1N3      | Leg  |
| 27F12           | C1V3      |      |
| 27F13           | U1N1      | Leg  |
| 27F14           | U1V1      |      |
| 27F15           | Y1N2      | Leg  |
| 27F16           | Y1V2      |      |
| 27F17           | U1N3      | Hand |
| 27F18           | U1V3      |      |
| 27F19           | Z1N1      | Leg  |
| 27F20           | Z1V1      |      |

| <b>Region B</b> |           |      |
|-----------------|-----------|------|
| Primer          | Sample ID | Site |
| 27F1            | A1N1      | Leg  |
| 27F2            | A1V1      |      |
| 27F3            | A1N3      | Hand |
| 27F4            | A1V3      |      |
| 27F5            | P1N3      | Hand |
| 27F6            | P1V3      |      |
| 27F7            | P1N4      | Leg  |
| 27F8            | P1V4      |      |
| 27F9            | R1N1      | Leg  |
| 27F10           | R1V1      |      |
| 27F11           | R1N2      | Leg  |
| 27F12           | R1V2      |      |
| 27F13           | V1N2      | Hand |
| 27F14           | V1V2      |      |
| 27F15           | V1N4      | Leg  |
| 27F16           | V1V4      |      |
| 27F17           | X1N1      | Hand |
| 27F18           | X1V1      |      |
| 27F19           | X1N4      | Leg  |
| 27F20           | X1V4      |      |

**Table S8:** A list of differentially abundant taxa (RDP classification) between lesional and non-lesional skin obtained using the Wilcoxon test coupled to a bootstrapping approach. In each iteration of the bootstrap method, taxa with significantly different abundance were initially identified using Benjamini-Hochberg p-value correction at an FDR of 0.0001. Subsequently, taxa which were observed as having a significantly different abundance (post BH correction) in at least 99.5% of iterations were retained and are shown below. Samples in this analysis were obtained from anatomically similar sites.

| <i>Taxonomic Level</i> | <i>Phylum Affiliation</i> | <i>Relative Contribution (%)</i> |                 | <i>Median, Range (%)</i> |                      |                      |
|------------------------|---------------------------|----------------------------------|-----------------|--------------------------|----------------------|----------------------|
|                        |                           | <i>Normal</i>                    | <i>Vitiligo</i> | <i>Normal</i>            | <i>Vitiligo</i>      |                      |
|                        | Dermacoccus               | Actinobacteria                   | 0.050           | 0.240                    | 0.006, 0.000-1.047 ▲ | 0.000, 0.000-0.473   |
|                        | Brevibacillus             | Firmicutes                       | 0.010           | 0.040                    | 0.006, 0.000-0.261 ▲ | 0.000, 0.000-0.044   |
|                        | Roseomonas                | Proteobacteria                   | 0.040           | 0.070                    | 0.050, 0.006-0.167 ▲ | 0.017, 0.000-0.234   |
|                        | Novosphingobium           | Proteobacteria                   | 0.020           | 0.050                    | 0.050, 0.000-0.099 ▲ | 0.013, 0.000-0.075   |
|                        | Proteiniclasticum         | Firmicutes                       | 0.020           | 0.010                    | 0.010, 0.000-0.061 ▲ | 0.008, 0.000-0.111   |
|                        | Pelomonas                 | Proteobacteria                   | 0.020           | 0.120                    | 0.006, 0.000-0.467 ▲ | 0.000, 0.000-0.067   |
|                        | Achromobacter             | Proteobacteria                   | 0.010           | 0.020                    | 0.000, 0.000-0.073 ▲ | 0.000, 0.000-0.043   |
|                        | Cellvibrio                | Proteobacteria                   | 0.000           | 0.030                    | 0.012, 0.000-0.220 ▲ | 0.000, 0.000-0.013   |
|                        | Geminicoccus              | Proteobacteria                   | 0.010           | 0.020                    | 0.005, 0.000-0.348 ▲ | 0.000, 0.000-0.037   |
| <b>GENUS</b>           | Nocardia                  | Actinobacteria                   | 0.000           | 0.020                    | 0.005, 0.000-0.200 ▲ | 0.000, 0.000-0.078   |
|                        | Leucobacter               | Actinobacteria                   | 0.010           | 0.010                    | 0.000, 0.000-0.050   | 0.007, 0.000-0.035 ▲ |
|                        | Yimella                   | Actinobacteria                   | 0.090           | 0.020                    | 0.000, 0.000-0.334   | 0.014, 0.000-0.545 ▲ |
|                        | Aeromicrobium             | Actinobacteria                   | 0.030           | 0.040                    | 0.012, 0.000-0.132   | 0.025, 0.000-0.098 ▲ |
|                        | Varibaculum               | Actinobacteria                   | 0.010           | 0.020                    | 0.000, 0.000-0.063   | 0.007, 0.000-0.156 ▲ |
|                        | Skermanella               | Proteobacteria                   | 0.150           | 0.060                    | 0.011, 0.000-0.295   | 0.059, 0.000-0.675 ▲ |
|                        | Erythrobacter             | Proteobacteria                   | 0.010           | 0.010                    | 0.000, 0.000-0.030   | 0.007, 0.000-0.044 ▲ |
|                        | Vibrio                    | Proteobacteria                   | 0.010           | 0.030                    | 0.000, 0.000-0.201   | 0.007, 0.000-0.104 ▲ |
|                        | Atopostipes               | Firmicutes                       | 0.010           | 0.020                    | 0.000, 0.000-0.098   | 0.007, 0.000-0.085 ▲ |
|                        | Leuconostoc               | Firmicutes                       | 0.010           | 0.010                    | 0.000, 0.000-0.074   | 0.007, 0.000-0.044 ▲ |
|                        | Erythromicrobium          | Proteobacteria                   | 0.010           | 0.020                    | 0.000, 0.000-0.332   | 0.005, 0.000-0.062 ▲ |

|               |                                    |                |       |       |                     |                     |
|---------------|------------------------------------|----------------|-------|-------|---------------------|---------------------|
|               | Flavobacteriaceae                  | Bacteroidetes  | 1.080 | 1.300 | 1.178, 0.114-3.050▲ | 0.658, 0.235-4.255  |
|               | Beijerinckiaceae                   | Proteobacteria | 0.070 | 0.100 | 0.021, 0.000-0.322▲ | 0.006, 0.000-0.294  |
|               | Enterococcaceae                    | Firmicutes     | 0.100 | 0.150 | 0.046, 0.000-0.272▲ | 0.020, 0.000-0.385  |
| <b>FAMILY</b> | Rhodospirillaceae                  | Proteobacteria | 0.150 | 0.070 | 0.021, 0.000-0.269  | 0.057, 0.016-0.532▲ |
|               | Vibrionaceae                       | Proteobacteria | 0.010 | 0.030 | 0.005, 0.000-0.220  | 0.006, 0.000-0.100▲ |
|               | Eubacteriaceae                     | Firmicutes     | 0.010 | 0.010 | 0.000, 0.000-0.053  | 0.004, 0.000-0.024▲ |
|               | Promicromonosporaceae              | Actinobacteria | 0.010 | 0.010 | 0.000, 0.000-0.058  | 0.003, 0.000-0.102▲ |
|               | Micromonosporaceae                 | Actinobacteria | 0.020 | 0.090 | 0.000, 0.000-0.326  | 0.012, 0.000-0.063▲ |
|               | Alphaproteobacteria_incertae_sedis | Proteobacteria | 0.000 | 0.020 | 0.005, 0.000-0.309▲ | 0.000, 0.000-0.035  |
| <b>ORDER</b>  | Vibrionales                        | Proteobacteria | 0.010 | 0.030 | 0.005, 0.000-0.212  | 0.006, 0.000-0.097▲ |
|               | Myxococcales                       | Proteobacteria | 0.020 | 0.000 | 0.000, 0.000-0.031  | 0.011, 0.000-0.057▲ |
| <b>CLASS</b>  | Acidobacteria_Gp1                  | Acidobacteria  | 0.01  | 0.01  | 0.000, 0.000-0.028  | 0.007, 0.000-0.040▲ |

**Table S9:** A list of differentially abundant OTUs between lesional (Vitiligo) and non-lesional (Normal) skin obtained using the Wilcoxon test coupled to a bootstrapping approach. In each iteration of the bootstrap method, taxa with significantly different abundance were initially identified using Benjamini-Hochberg p-value correction at an FDR of 0.0001. Subsequently, taxa which were observed as having a significantly different abundance (post BH correction) in at least 99.5% of iterations were retained and are shown below. Samples in this analysis were obtained from anatomically similar sites.

| <i>OTU</i>                | <i>Phylum Affiliation</i> | <i>Relative Contribution (%)</i> |                 | <i>Median, Range (%)</i> |                       |
|---------------------------|---------------------------|----------------------------------|-----------------|--------------------------|-----------------------|
|                           |                           | <i>Normal</i>                    | <i>Vitiligo</i> | <i>Normal</i>            | <i>Vitiligo</i>       |
| OTU_105_Skermanella       | Proteobacteria            | 0.13                             | 0.05            | 0.051, 0.000-0.467 ▲     | 0.010, 0.000-0.240    |
| OTU_208_Bacillus          | Firmicutes                | 0.01                             | 0.01            | 0.007, 0.000-0.090 ▲     | 0.000, 0.000-0.225    |
| OTU_593_Aeromicrobium     | Actinobacteria            | 0.02                             | 0.02            | 0.005, 0.000-0.071 ▲     | 0.000, 0.000-0.094    |
| OTU_606_Hahella           | Proteobacteria            | 0.00                             | 0.02            | 0.005, 0.000-0.018 ▲     | 0.000, 0.000-0.084    |
| OTU_946_Clostridiaceae    | Firmicutes                | 0.02                             | 0.01            | 0.012, 0.000-0.047 ▲     | 0.000, 0.000-0.066    |
| OTU_1078_Massilia         | Proteobacteria            | 0.02                             | 0.02            | 0.018, 0.000-0.071 ▲     | 0.009, 0.000-0.045    |
| OTU_1111_Planococcaceae   | Firmicutes                | 0.01                             | 0.00            | 0.005, 0.000-0.079 ▲     | 0.000, 0.000-0.009    |
| OTU_1621_Anaerococcus     | Firmicutes                | 0.01                             | 0.01            | 0.008, 0.000-0.087 ▲     | 0.000, 0.000-0.080    |
| OTU_1674_Schlegelella     | Proteobacteria            | 0.01                             | 0.01            | 0.015, 0.000-0.054 ▲     | 0.000, 0.000-0.040    |
| OTU_1763_Sanguibacter     | Actinobacteria            | 0.03                             | 0.03            | 0.019, 0.000-0.126 ▲     | 0.008, 0.000-0.275    |
| OTU_1_Enterobacteriaceae  | Proteobacteria            | 0.99                             | 0.70            | 0.104, 0.000-4.800       | 0.221, 0.000-1.830 ▲  |
| OTU_19_Xanthomonadaceae   | Proteobacteria            | 0.28                             | 0.26            | 0.077, 0.029-0.976       | 0.132, 0.000-0.616 ▲  |
| OTU_32_Propionibacterium  | Actinobacteria            | 7.73                             | 12.19           | 1.312, 0.217-48.211      | 2.862, 0.188-51.543 ▲ |
| OTU_42_Nocardioides       | Actinobacteria            | 0.16                             | 0.23            | 0.153, 0.059-0.261       | 0.176, 0.030-0.652 ▲  |
| OTU_50_Brevundimonas      | Proteobacteria            | 0.42                             | 0.60            | 0.162, 0.071-1.450       | 0.317, 0.000-1.616 ▲  |
| OTU_85_Roseomonas         | Proteobacteria            | 0.01                             | 0.03            | 0.005, 0.000-0.050       | 0.025, 0.000-0.070 ▲  |
| OTU_115_Bacilli           | Firmicutes                | 0.35                             | 0.45            | 0.043, 0.000-1.582       | 0.112, 0.000-1.175 ▲  |
| OTU_143_Saccharopolyspora | Actinobacteria            | 0.02                             | 0.10            | 0.004, 0.000-0.081       | 0.025, 0.000-0.355 ▲  |
| OTU_566_Tessaracoccus     | Actinobacteria            | 0.11                             | 0.14            | 0.084, 0.020-0.395       | 0.109, 0.000-0.314 ▲  |
| OTU_651_Micropruina       | Actinobacteria            | 0.01                             | 0.01            | 0.000, 0.000-0.035       | 0.008, 0.000-0.040 ▲  |
| OTU_859_Thermomonas       | Proteobacteria            | 0.07                             | 0.10            | 0.043, 0.010-0.304       | 0.070, 0.000-0.342 ▲  |
| OTU_1577_Sphingomonas     | Proteobacteria            | 0.13                             | 0.36            | 0.054, 0.006-0.336       | 0.102, 0.010-0.826 ▲  |
| OTU_1938_Leifsonia        | Actinobacteria            | 0.00                             | 0.01            | 0.000, 0.000-0.025       | 0.005, 0.000-0.056 ▲  |
